# Supplementary material for: A method for the generation of human stem cell-derived alpha cells
Source: Nat Commun. 2020 May 7;11:2241. doi: 10.1038/s41467-020-16049-3 (PMC7205884; doi:10.1038/s41467-020-16049-3)
Supplement: Supplementary file 1 — Supplementary Information [file 41467_2020_16049_MOESM1_ESM.pdf]

# **A method for the generation of human stem cell-derived alpha cells**

Peterson et al.

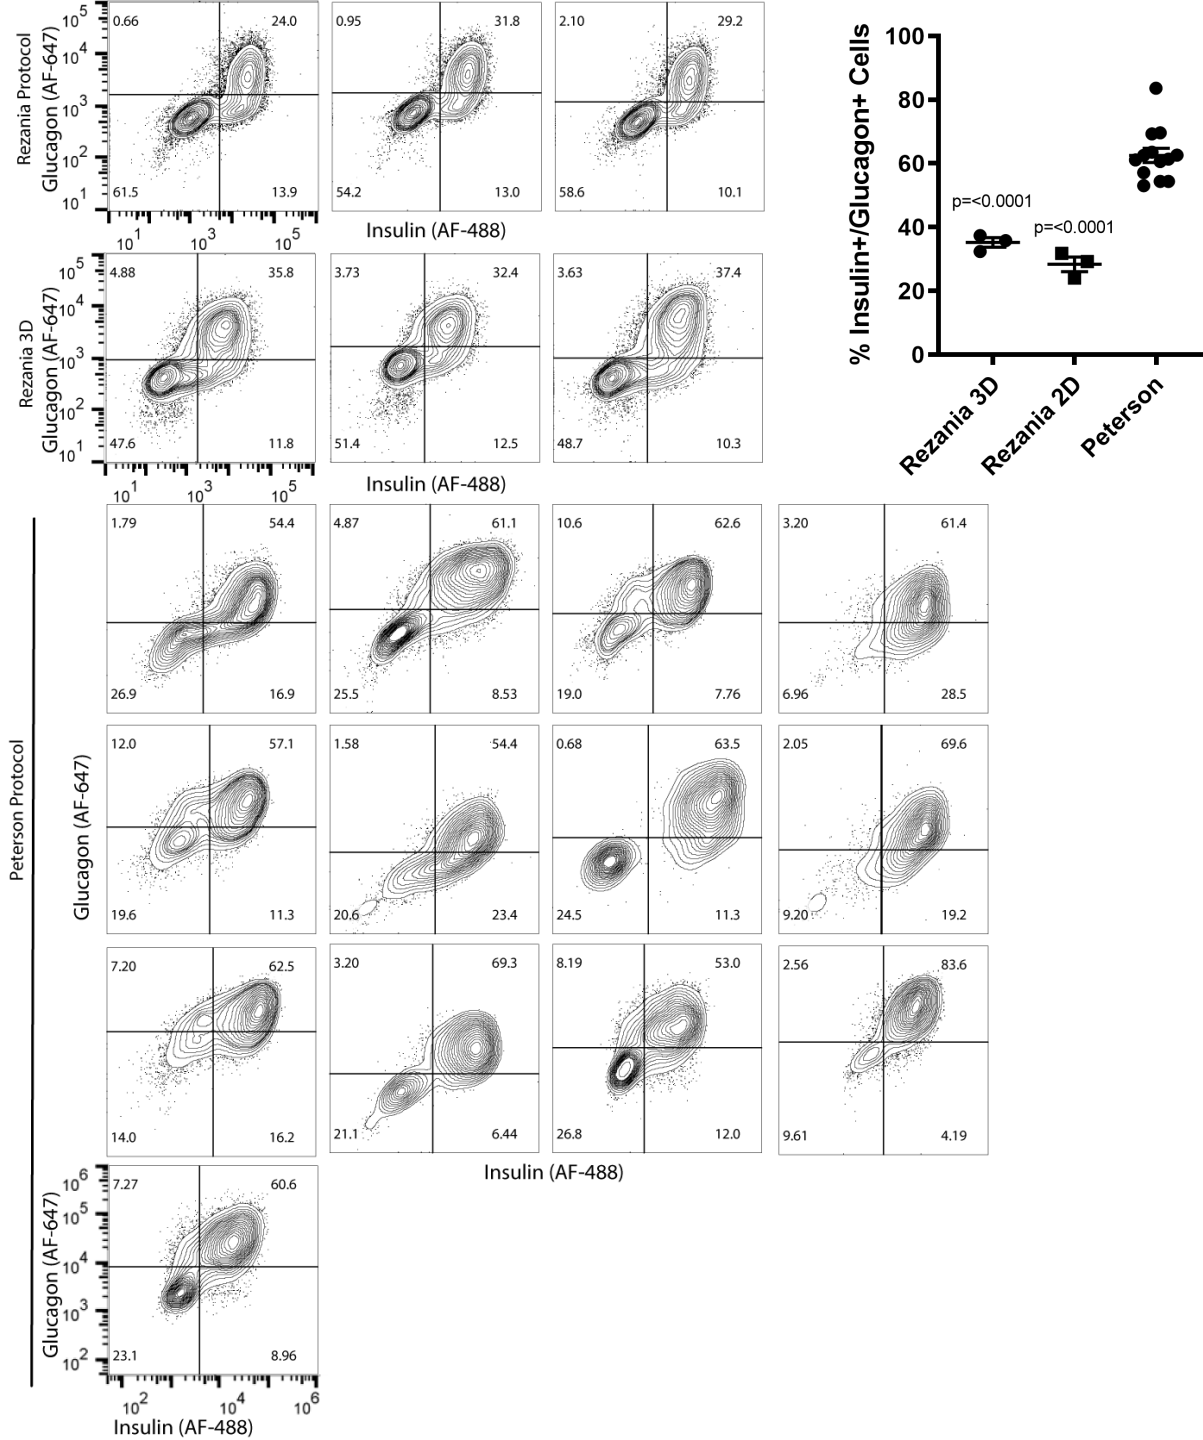

**Supplemental Figure 1.** Flow cytometry plots for differentiations at the end of stage 5 showing the percentage of polyhormonal (Ins+/Gcg+) cells from the original Rezania protocol (top, n=3 biologically independent samples), the Rezania protocol in 3D format (middle, n=3 biologically independent samples) and the Peterson protocol (bottom, n=13 biologically independent samples). Percentage of polyhormonal cells is summarized in the graph. Averaged data is expressed as mean +/- SEM. Significance calculated using an Ordinary one-way ANOVA with Dunnett multiple comparison test.

Supplemental Figure 2

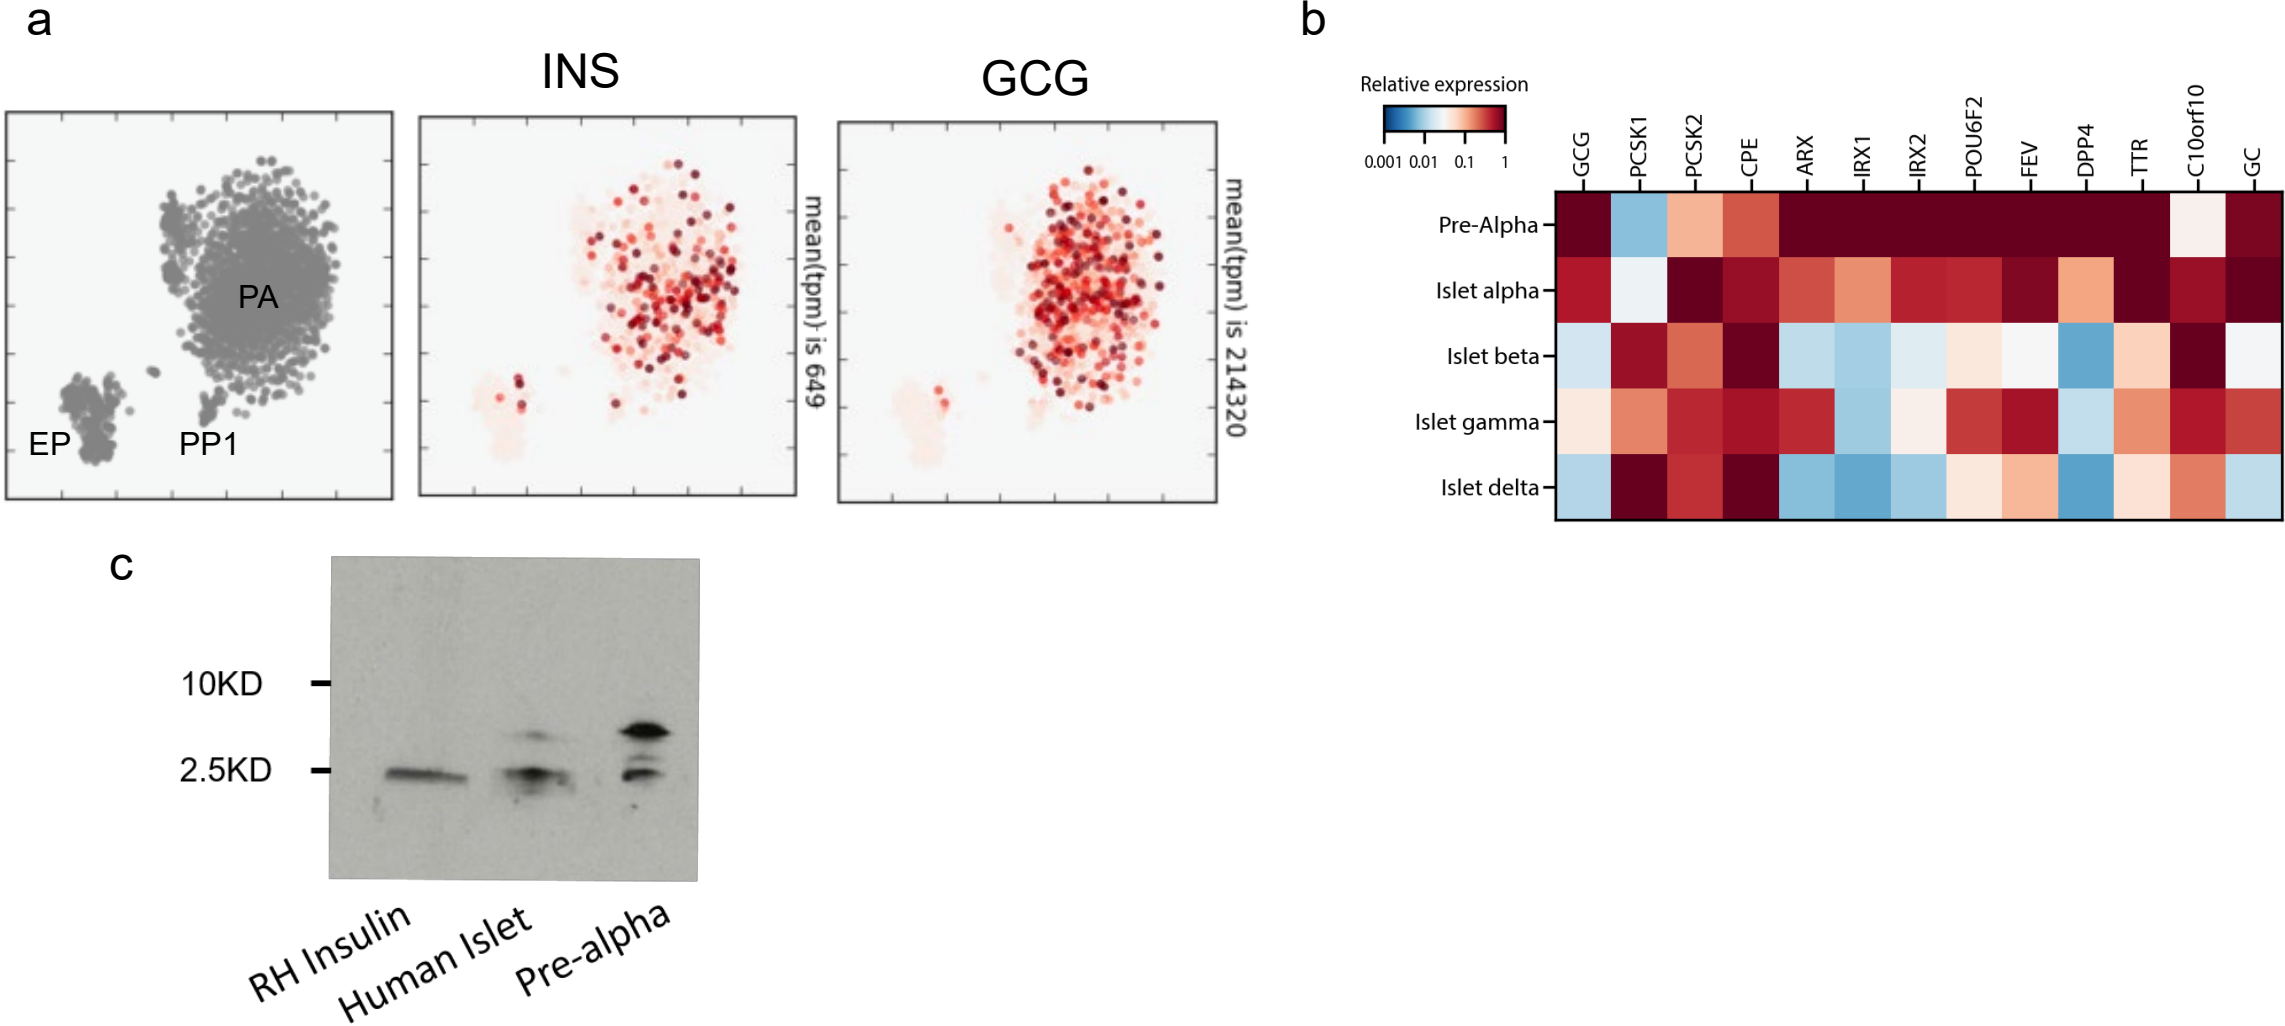

**Supplemental Figure 2.** a) tSNE plot of cells showing expression of insulin and glucagon in pre-alpha cells. b) Heatmap of key alpha cell marker transcript expression levels in pre-alpha cells compared to endocrine cell types from human islets. c) Western blot shows the identification of insulin content in pre-alpha cells compared to recombinant human (RH) insulin and human islets.

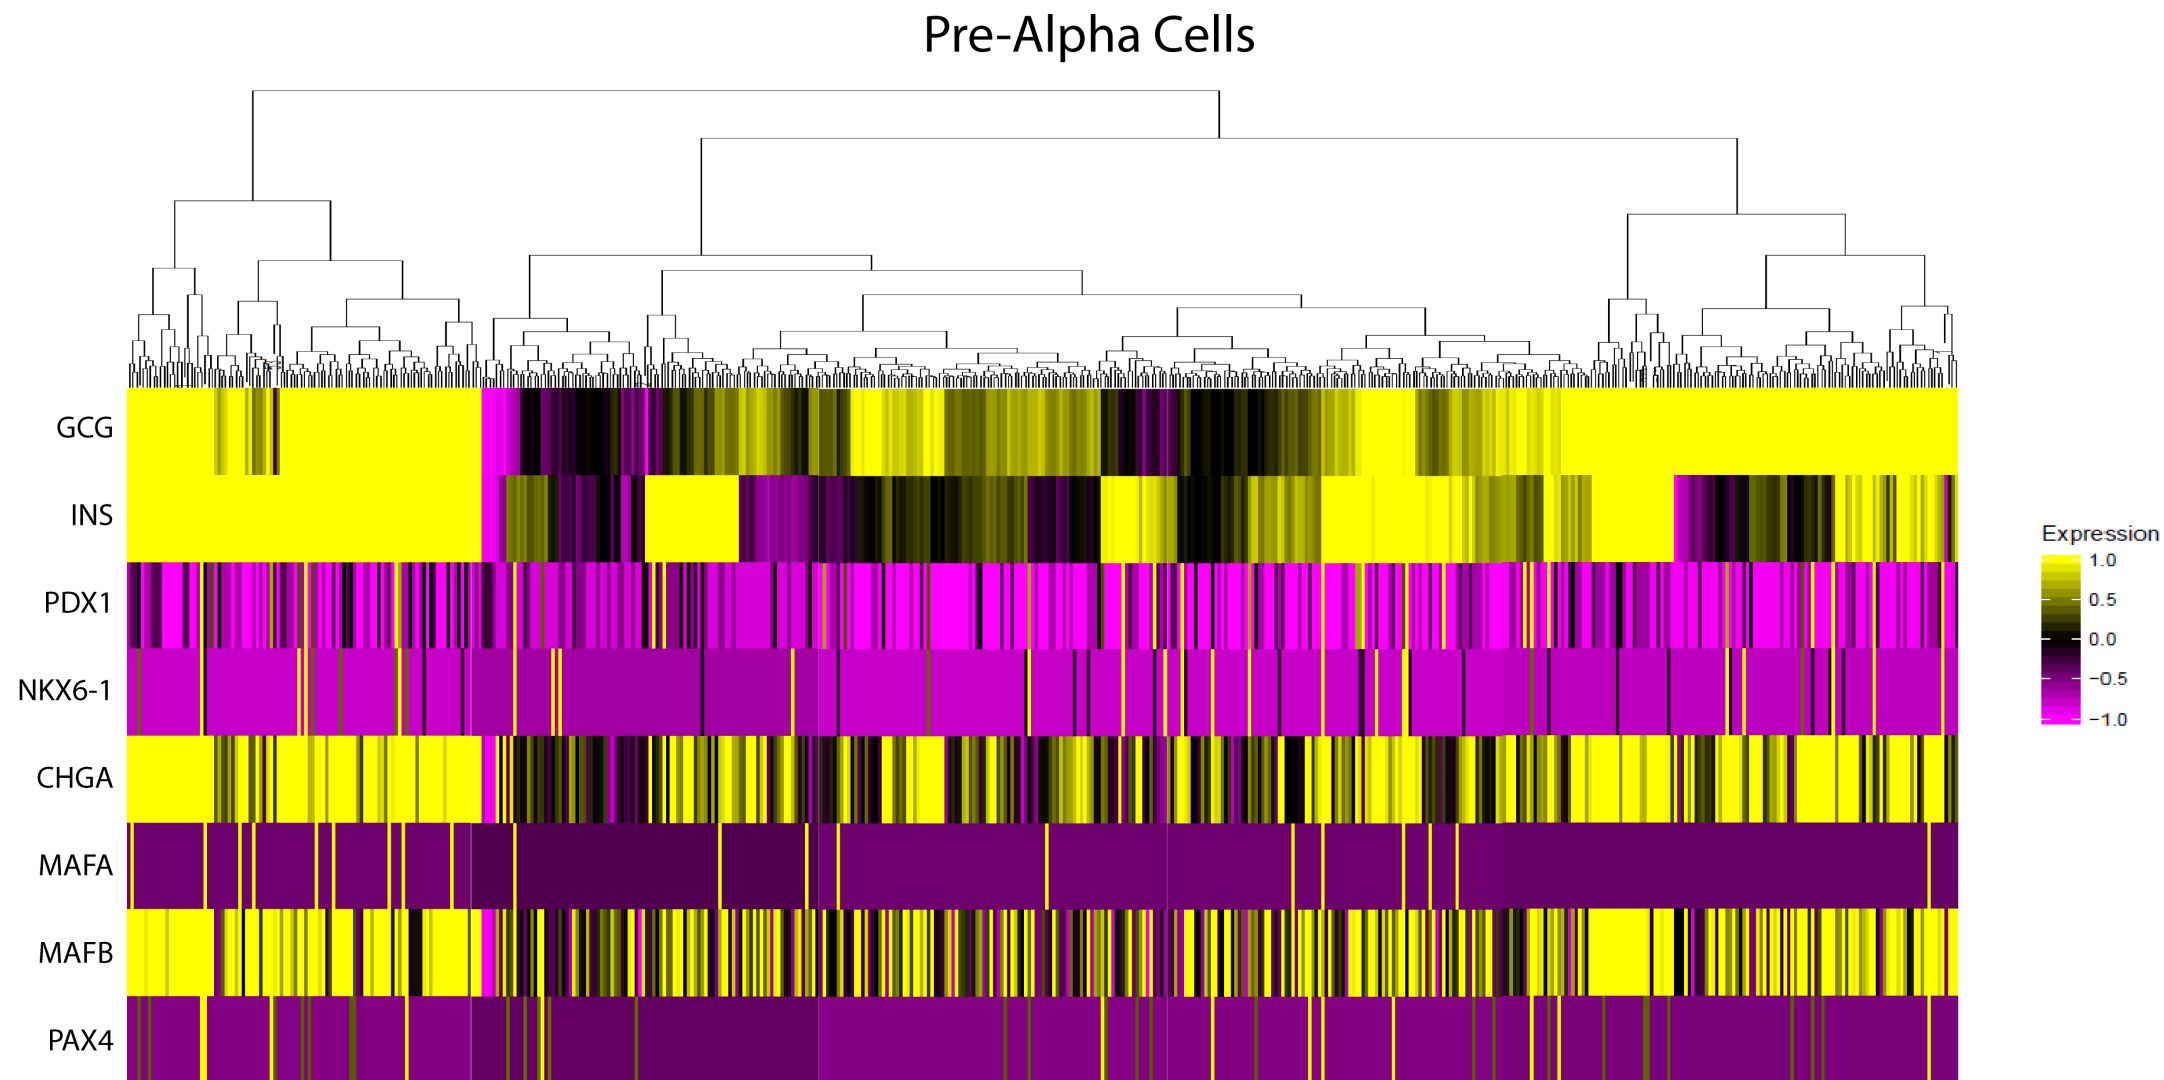

**Supplemental Figure 3.** Hierarchical heatmap of common alpha (GCG), alpha and beta (CHGA, MAFB) and beta (INS, PDX1, NKX6-1, MAFA, PAX4) cell markers in pre-alpha cells. Columns correspond to individual cells and rows correspond to individual genes. Color scale based on z-score distribution from -1 (purple) to 1 (yellow).

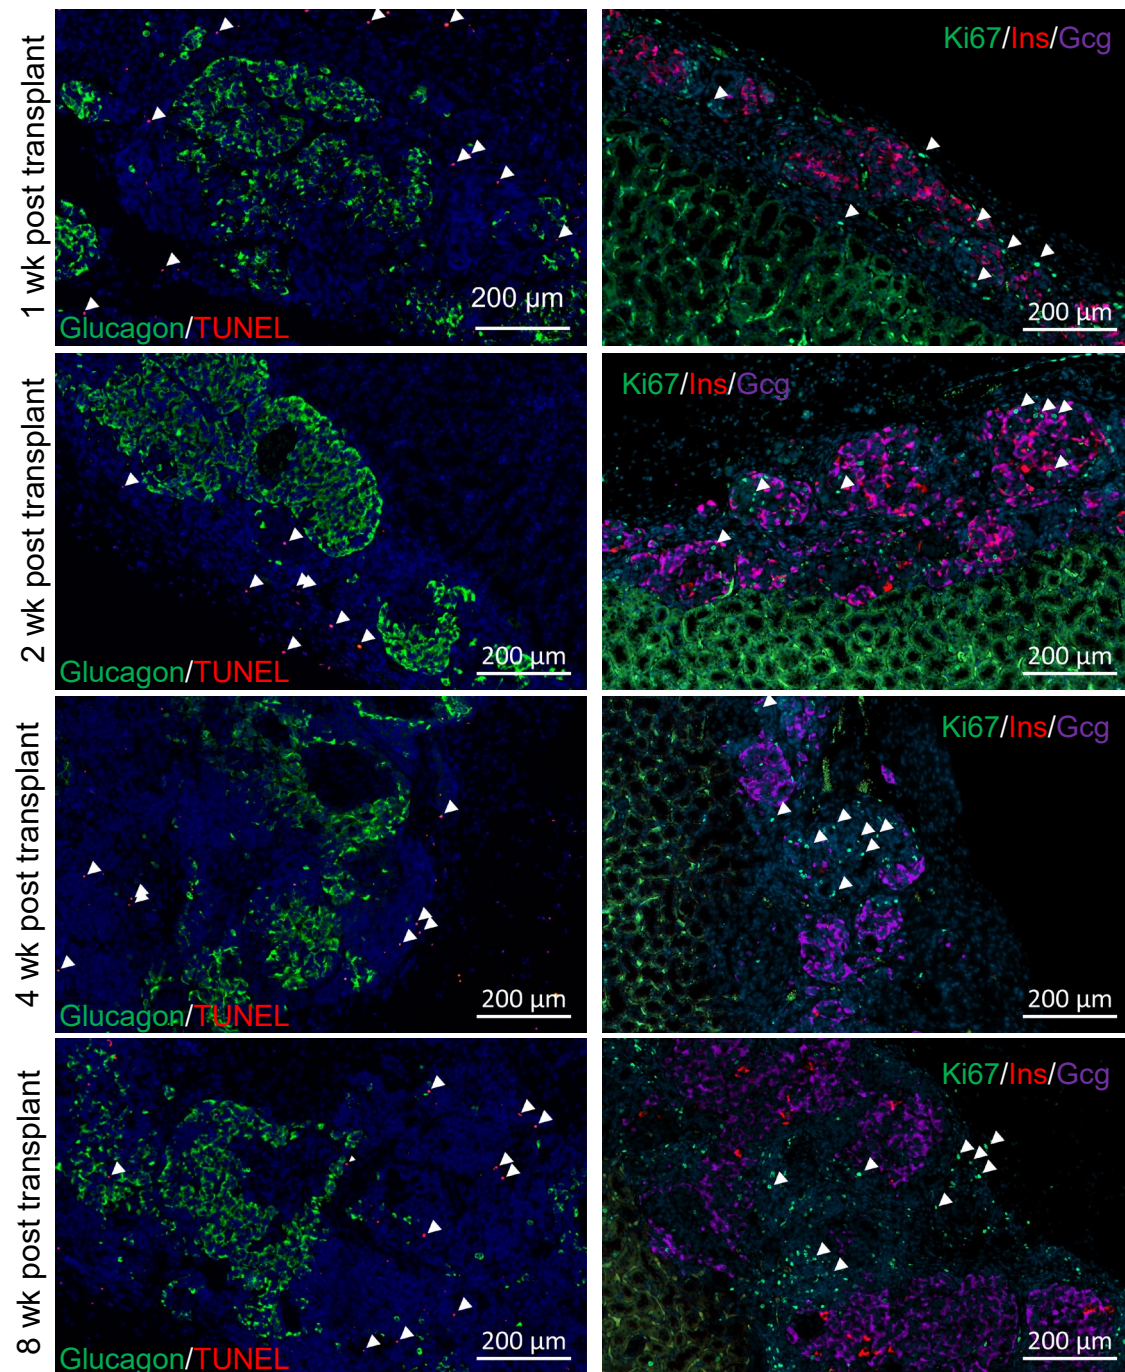

### Supplemental Figure 4.

Characterization of TUNEL and Ki67 in transplanted pre-alpha cells at 1 week, 2 weeks, 4 weeks and 8 weeks post transplant. TUNEL positive cells are only occasionally observed colocalizing with glucagon. Ki67 positive cells are occasionally found colocalizing with glucagon at all time points, but are mainly restricted to non-hormone positive cells. Arrows indicate TUNEL positive cells (Left) or Ki67 positive cells (Right)

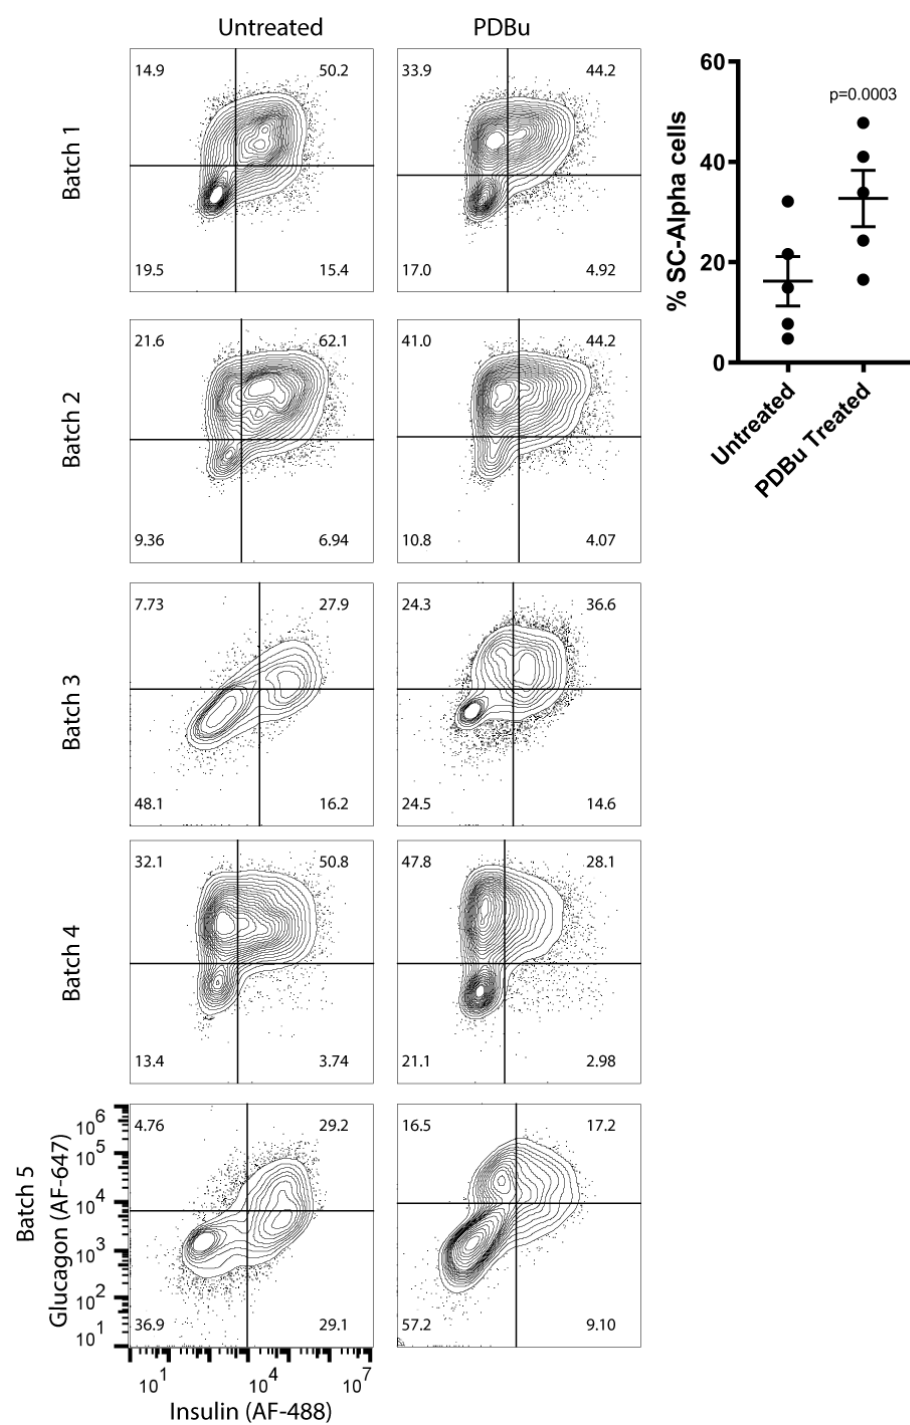

**Supplemental Figure 5.** Flow cytometry plots for differentiations at the end of stage 6 performed with and without treatment of PDBu during stage 6 and showing the percentage of monohormonal (Ins-/Gcg+) cells for each differentiation (n=5 biologically independent samples). Percentage of SC-alpha cells is summarized in the graph. Averaged data is expressed as mean +/- SEM. Significance calculated using a paired two-sided Student's t-test.

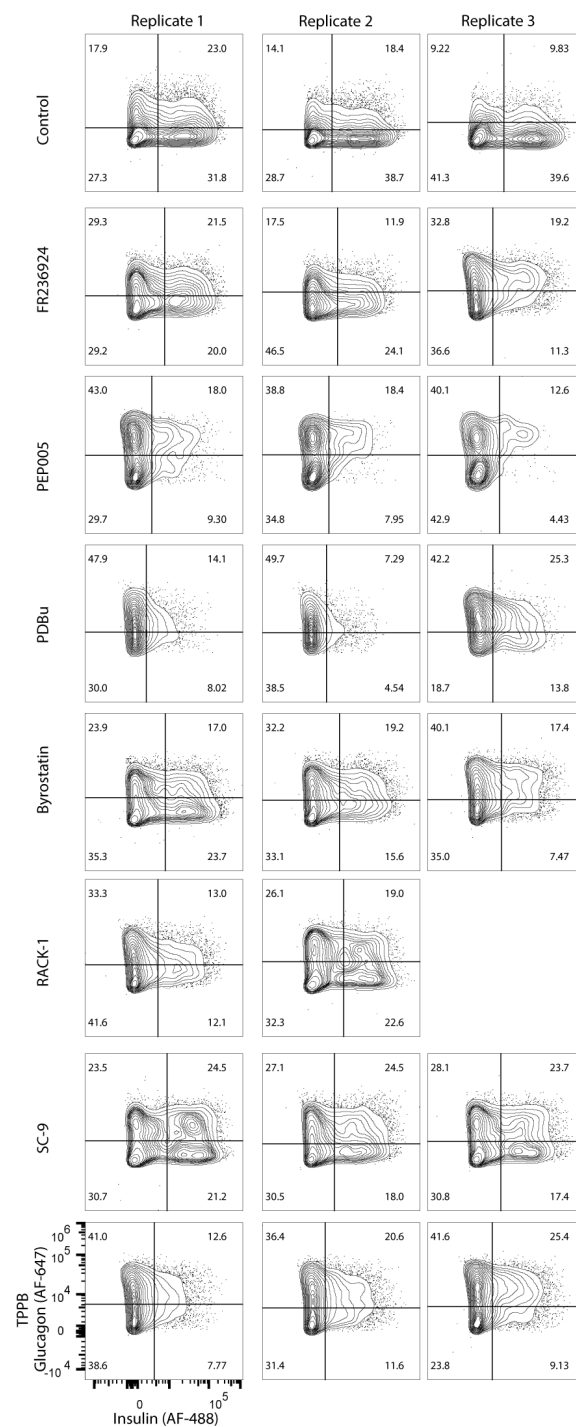

**Supplemental Figure 6.** Flow cytometry plots for differentiations performed with various PKC activators and analyzed at the end of stage 6. Flow plots show the percentage of monohormonal (Ins-/Gcg+) SC-alpha cells for each compound (n=3 biologically independent samples for most conditions). Percentage of polyhormonal cells is summarized in Figure 3.

## Supplemental Figure 7

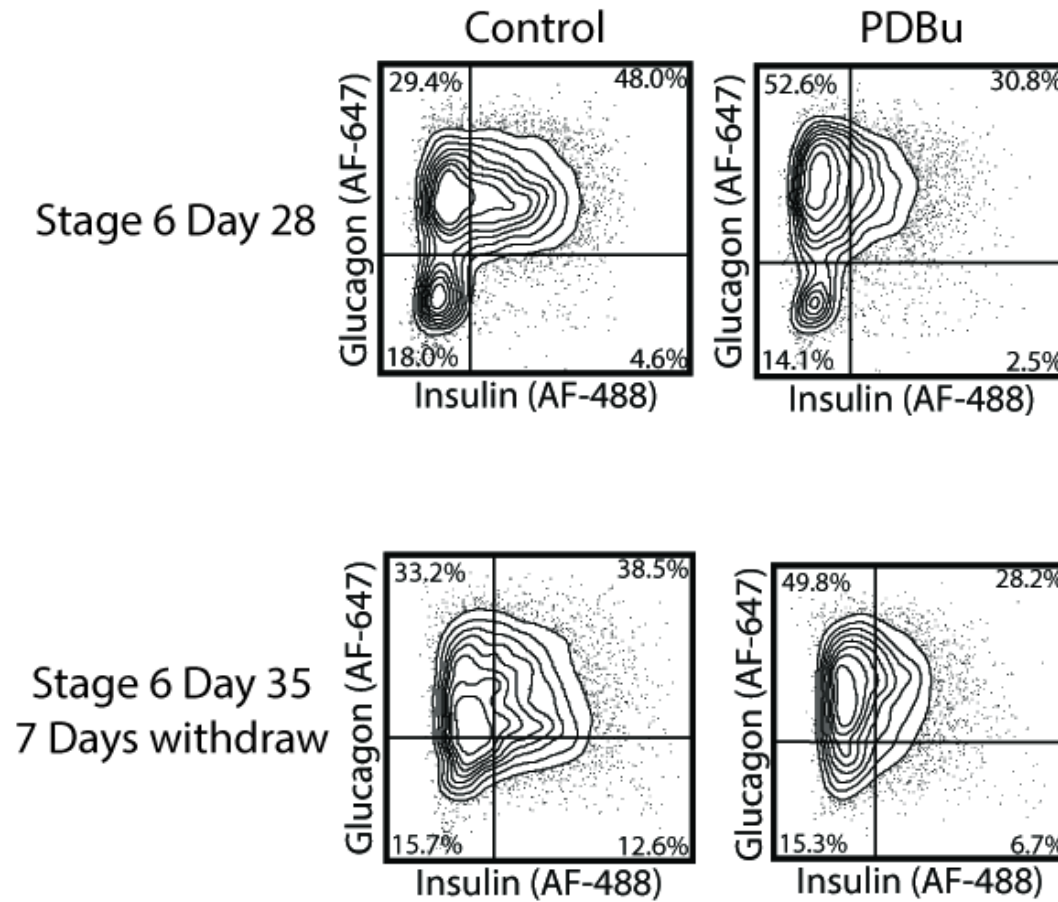

**Supplemental Figure 7.** Withdrawal of PDBu. SC-alpha cells derived with PDBu and control conditions were cultured in the absence of PDBu for 7 days to determine the stability of the monohormonal phenotype. Withdrawal of PDBu for 7 days did not significantly reduce the percentage of monohormonal SC-alpha cells.

# Supplemental Figure 8

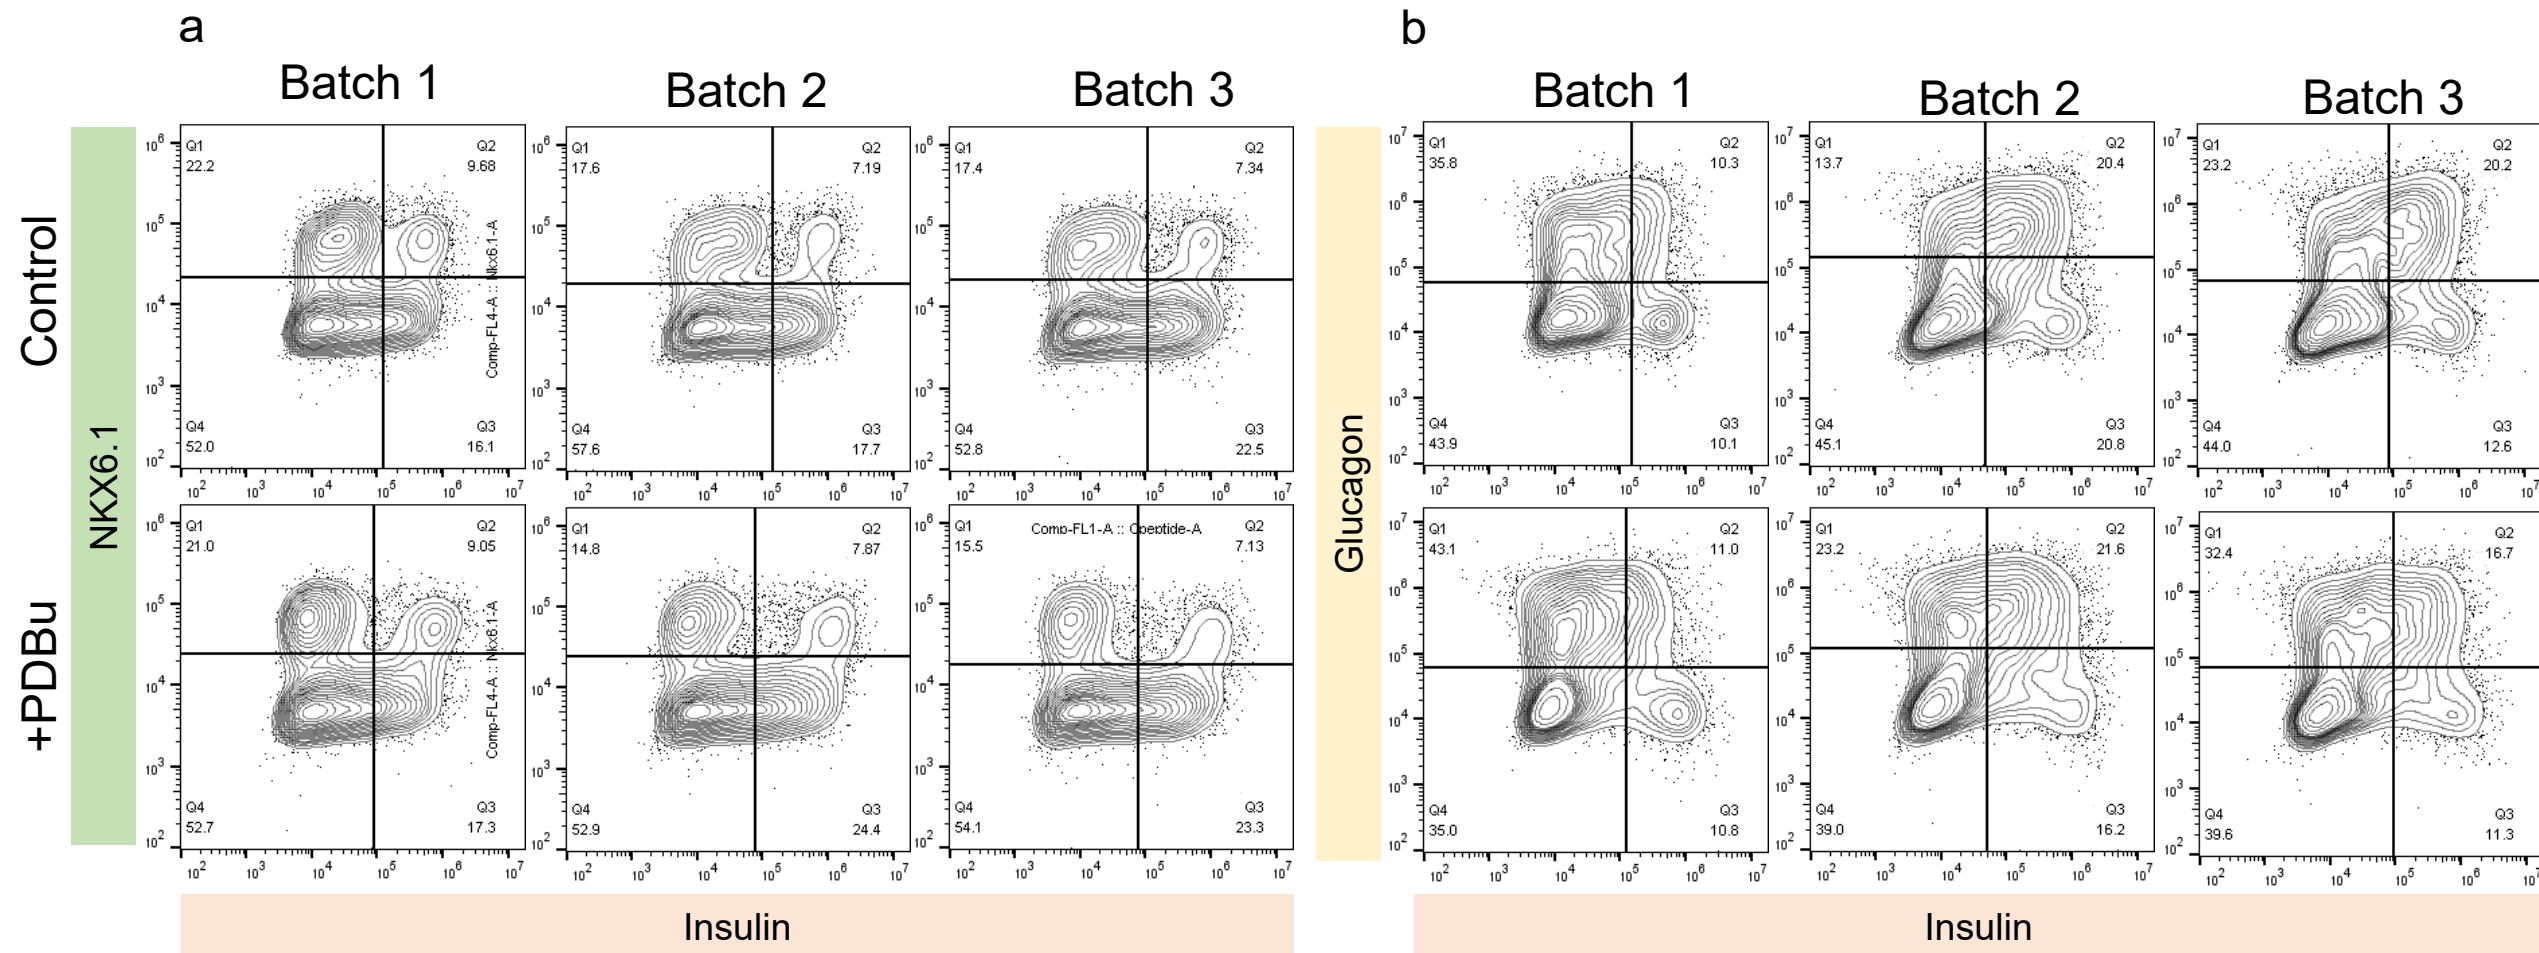

**Supplemental Figure 8.** Flow cytometry of three separate batches of HUES8 cells differentiated to SC-beta cells and treated with PDBu for 14 days during stage 6. a) PDBu treatment did not effect the percentage of NKX6.1/Insulin co-positive cells. b) PDBu treatment increases the percentage of glucagon monohormonal cells.

## Supplemental Figure 9

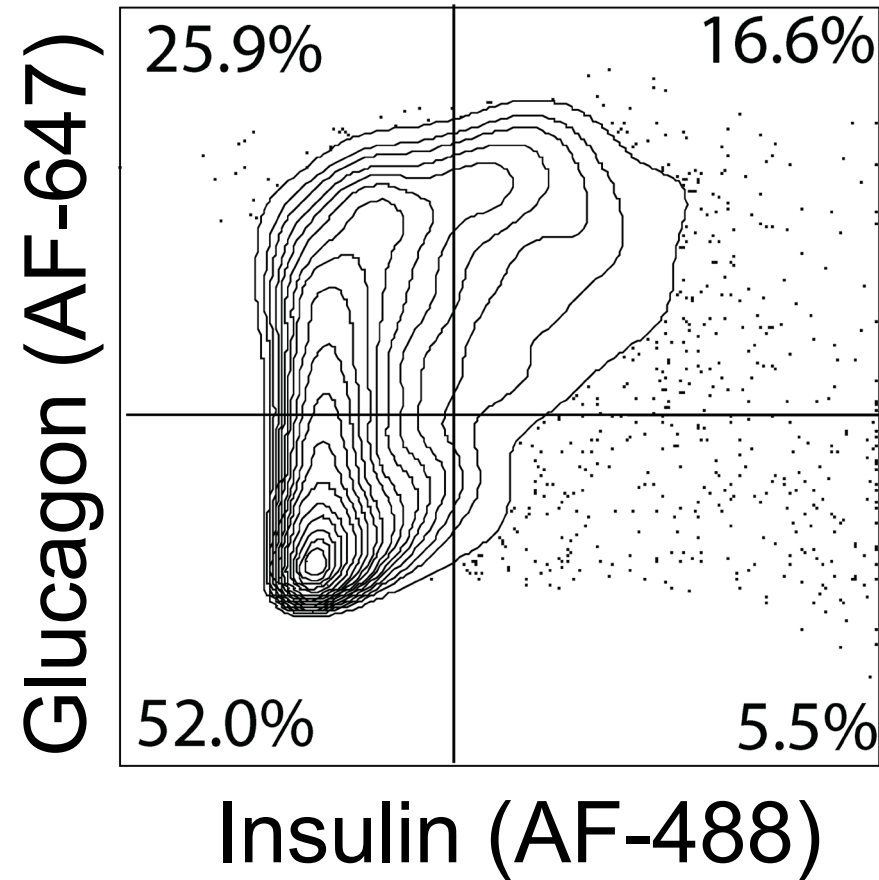

**Supplemental Figure 9.** Flow cytometry of the iPS cell line 1016 differentiated with the SC-alpha cell protocol. An increased concentration of LDN (1 $\mu$ M) during the differentiation (day 6, 7 and 8) was used and resulted in better differentiations in the 1016 cell line.

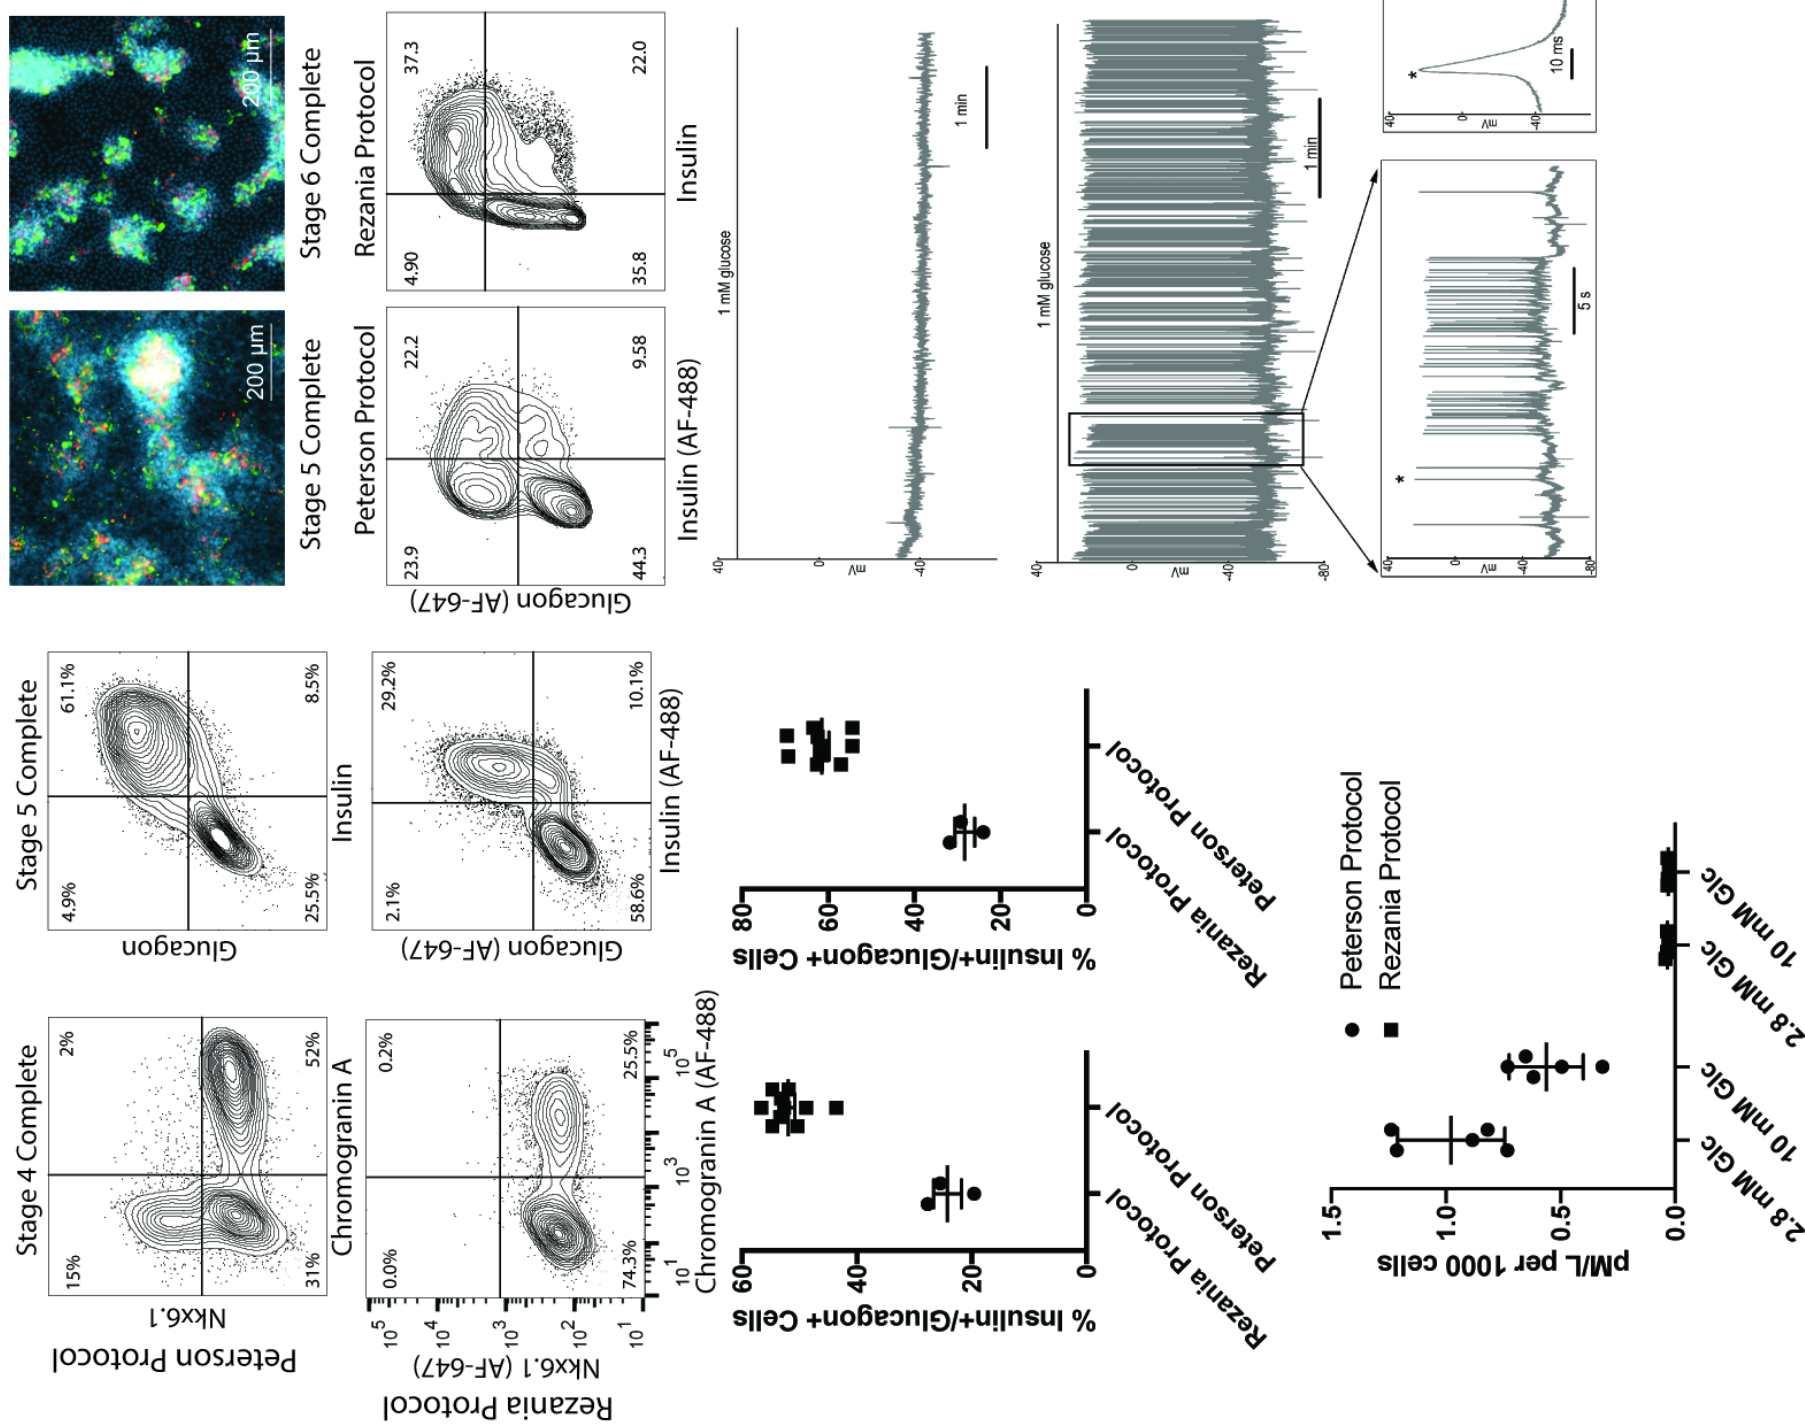

**Supplemental Figure 10.** Head-to-head comparison of Peterson and Rezania protocols in HUES8 cell line.

a) Representative flow cytometry results for cell populations at the end of stage 4, 5 and 6 for both the Peterson and Rezania protocols. Key markers were evaluated (Nkx6.1 and Chromogranin A for stage 4 complete, insulin and glucagon for stage 5 and 6 complete). Summary of multiple differentiations is shown in b) for stage 4 (Rezania n=3, Peterson n=10), c) for stage 5 (Rezania n=3, Peterson n=13) and d) for stage 6 (Rezania n=3, Peterson n=13). (Averaged data is expressed as mean +/- SEM). Individual replicate flow plots are shown in Supplemental figure 1, 11 and 12. The Rezania protocol results in scarce islands of hormone positive cells at stage 5 and stage 6 complete (e and f). These islands bud off the surface of the plate during the transition from stage 5 to stage 6, resulting in cell loss. g) comparison of glucagon secretion from stage 6 complete cells generated by Peterson (n=5) and Rezania (n=5) protocols in the 1016 iPS cell line at low and high glucose. (Averaged data is expressed as mean +/- SEM) h) Representative electrical activity recording of SC-alpha cell generated by the Peterson protocol in 1016 iPS cell line. Spontaneous action potentials are observed at low glucose (n=30). i) Representative electrical activity recording of glucagon positive cell generated by the Rezania protocol showing no electrical activity (n=4).

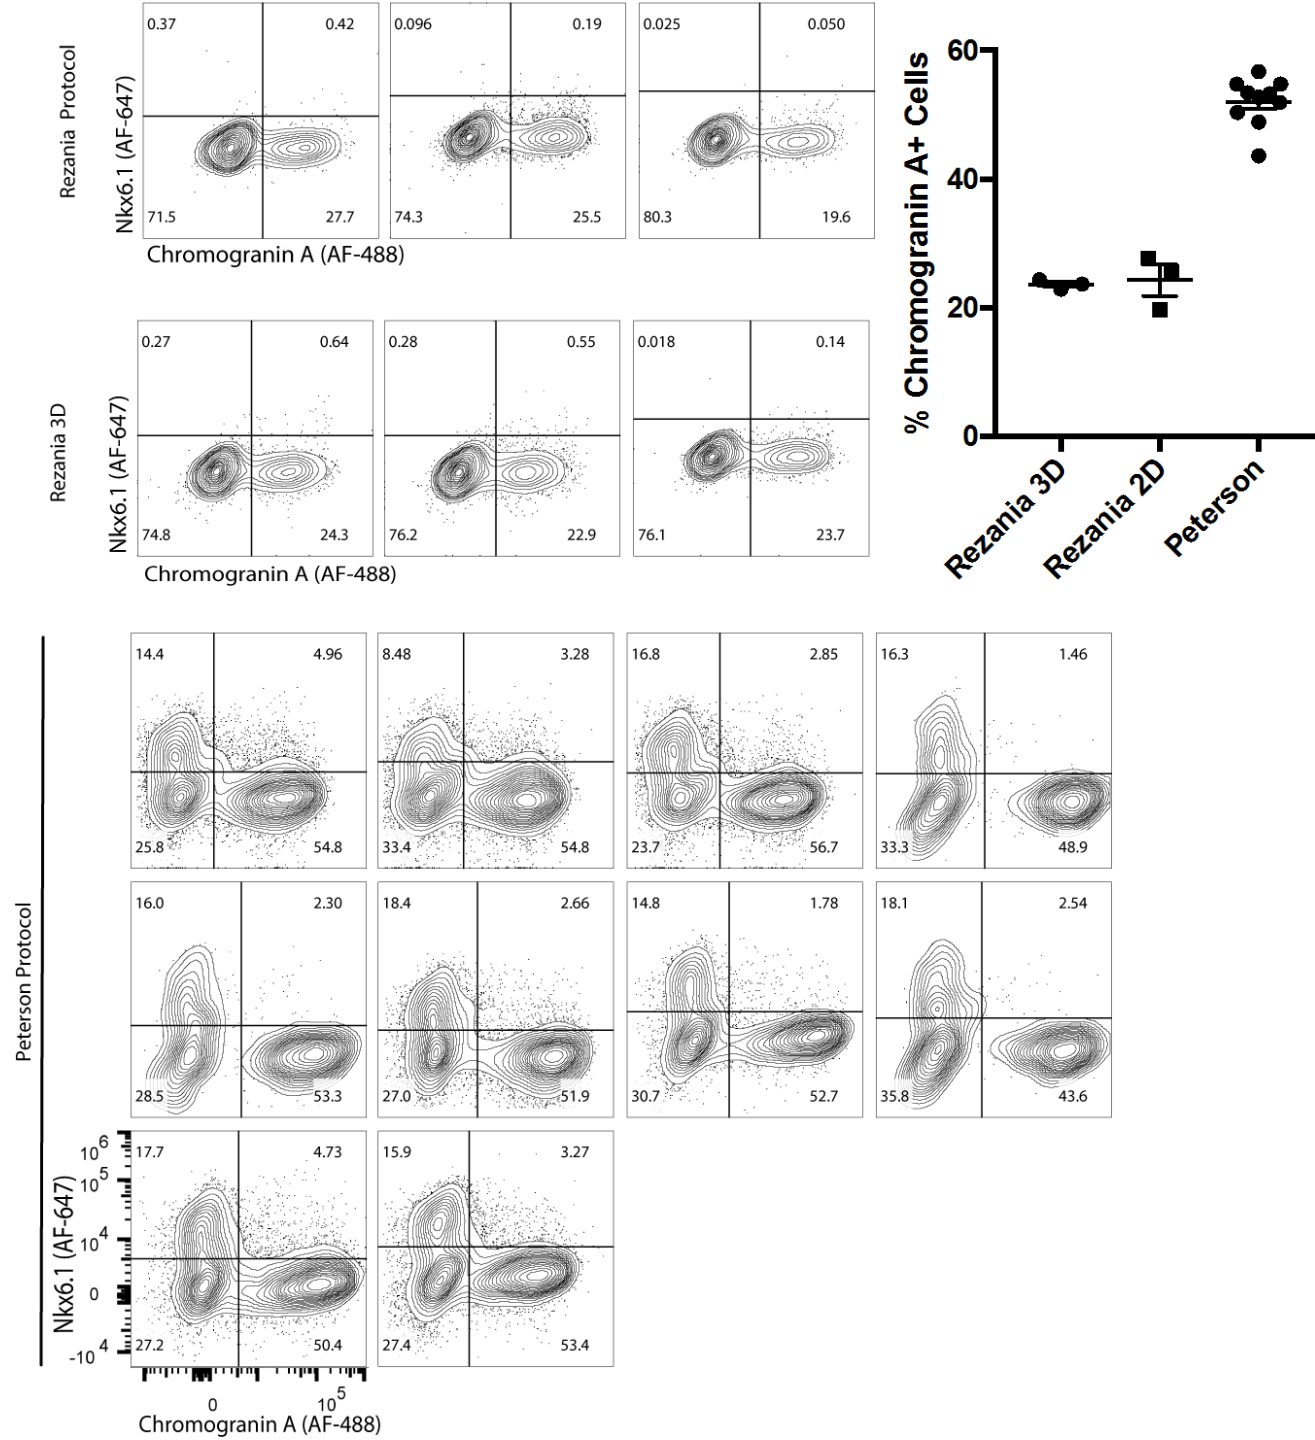

**Supplemental Figure 11.** Flow cytometry plots for differentiations at the end of stage 4 showing the percentage of chromogranin A+ cells for the original Rezania protocol (top, n=3 biologically independent samples), the Rezania protocol in 3D format (middle, n=3 biologically independent samples) and the Peterson protocol (bottom, n=10 biologically independent samples). Percentage of chromogranin A+ cells is summarized in the graph. Averaged data is expressed as mean  $\pm$  SEM.

Rezania Protocol

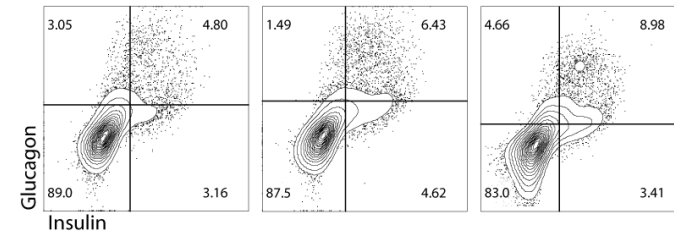

Rezania 3D

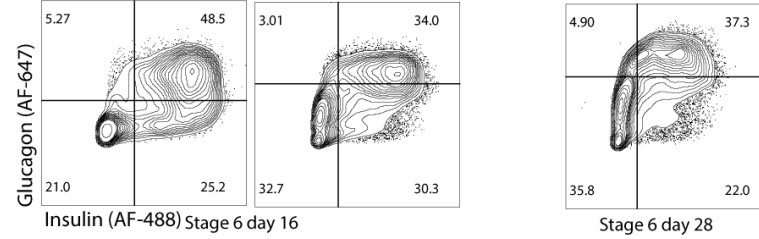

Peterson Protocol

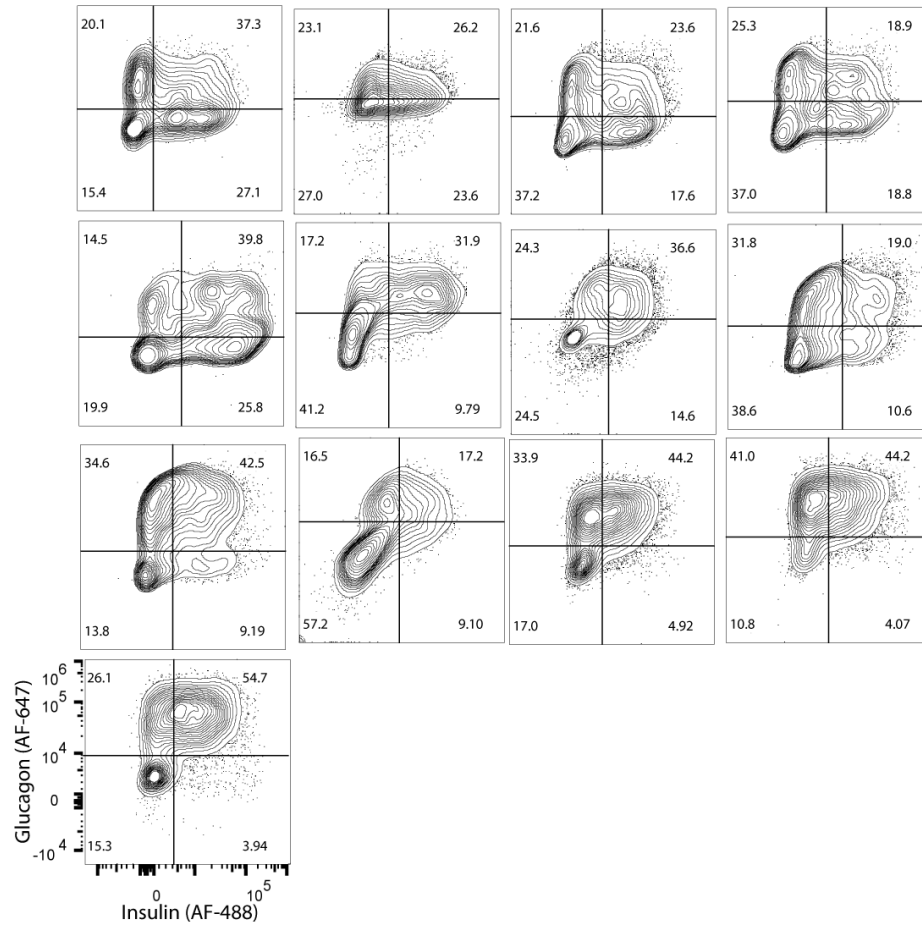

**Supplemental Figure 12.** Flow cytometry plots for differentiations at the end of stage 6 showing the percentage of monohormonal (Ins-/Gcg+) cells for the original Rezania protocol (top, n=3 biologically independent samples), the Rezania protocol in 3D format at stage 6 day 16 (n=2 biologically independent samples) and at stage 6 day 28 (n=1) (middle), and the Peterson protocol (bottom, n=13 biologically independent samples). Percentage of SC-alpha cells is summarized in Supplemental Figure 10d.

a

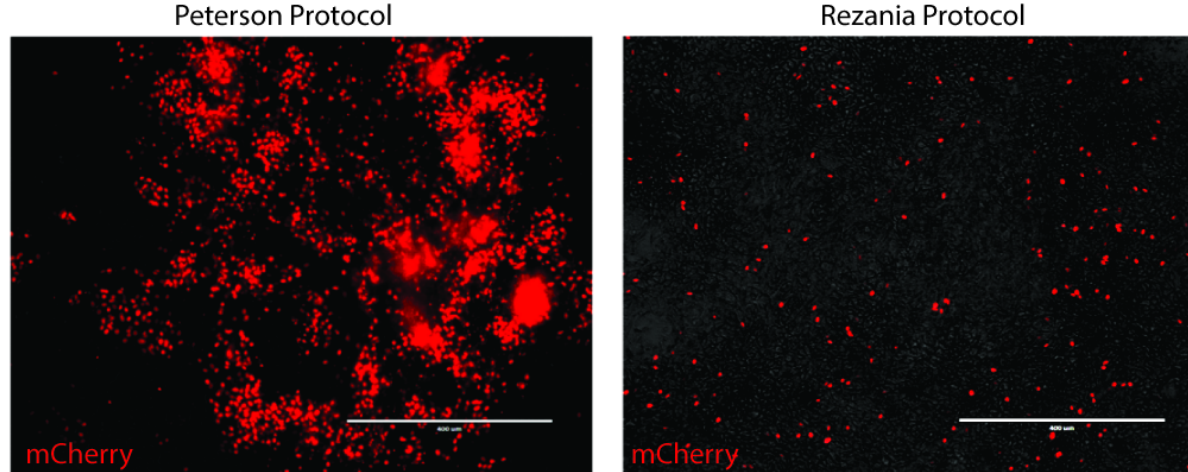

b

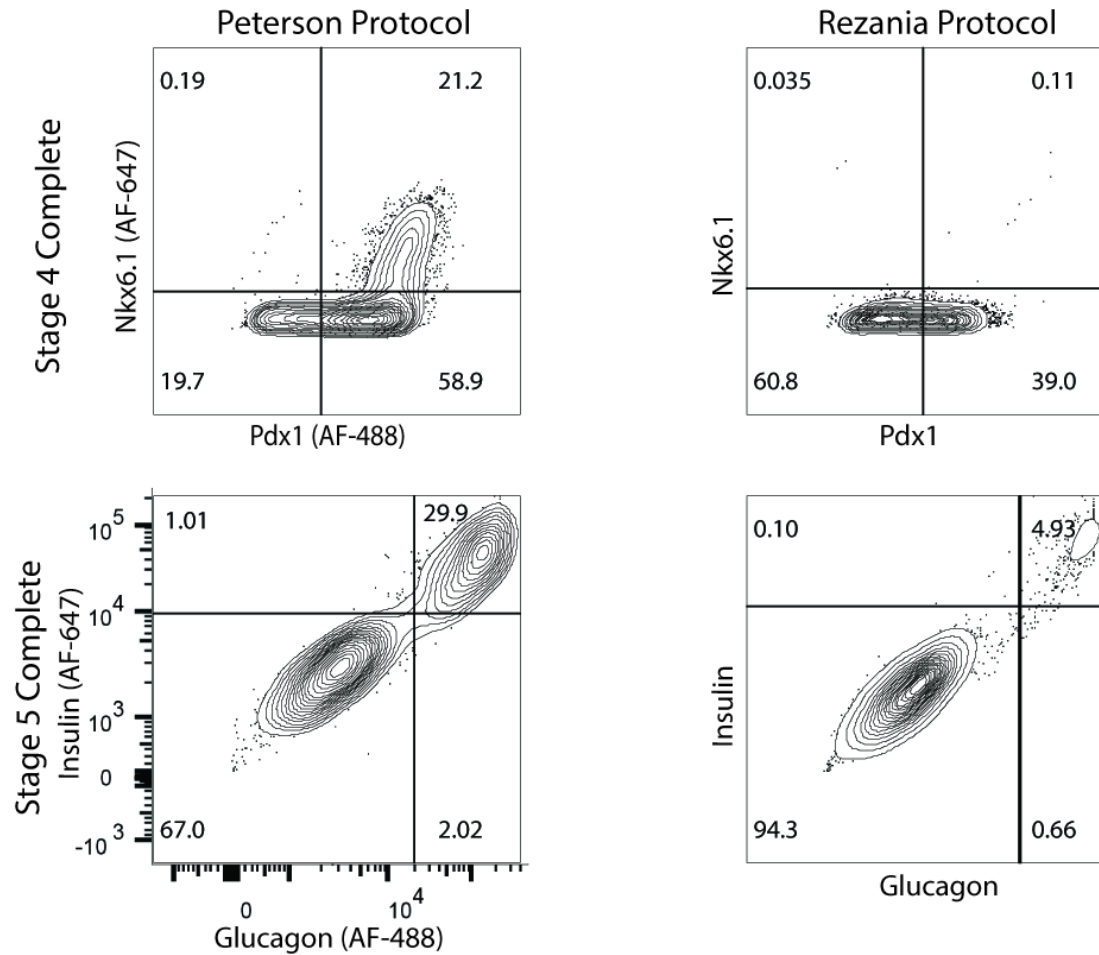

**Supplemental Figure 13.** Head-to-head comparison of Peterson and Rezania protocols in the 1016 cell line. a) Fluorescent images of cell population at stage 6 complete showing glucagon positive cells for both the Rezania and Peterson protocols. b) Representative flow cytometry results for cell populations at the end of stage 4 and 5 for both the Peterson and Rezania protocols.

KEGG

**Supplemental Figure 14.** Heatmap showing all pathways from KEGG terms for pre-alpha and SC-alpha cells. Columns show number of genes mapped to the pathway divided by number of possible genes in the pathway, in addition to its percentage. Scale is from  $-\log(\text{p-value})$  of 2 (light red) to 10 (green). All pathways that were not significant, i.e.  $-\log(\text{p-value})$  from 0 to 2, are labeled in red. P-values calculated using an EASE Score (modified Fisher Exact test).

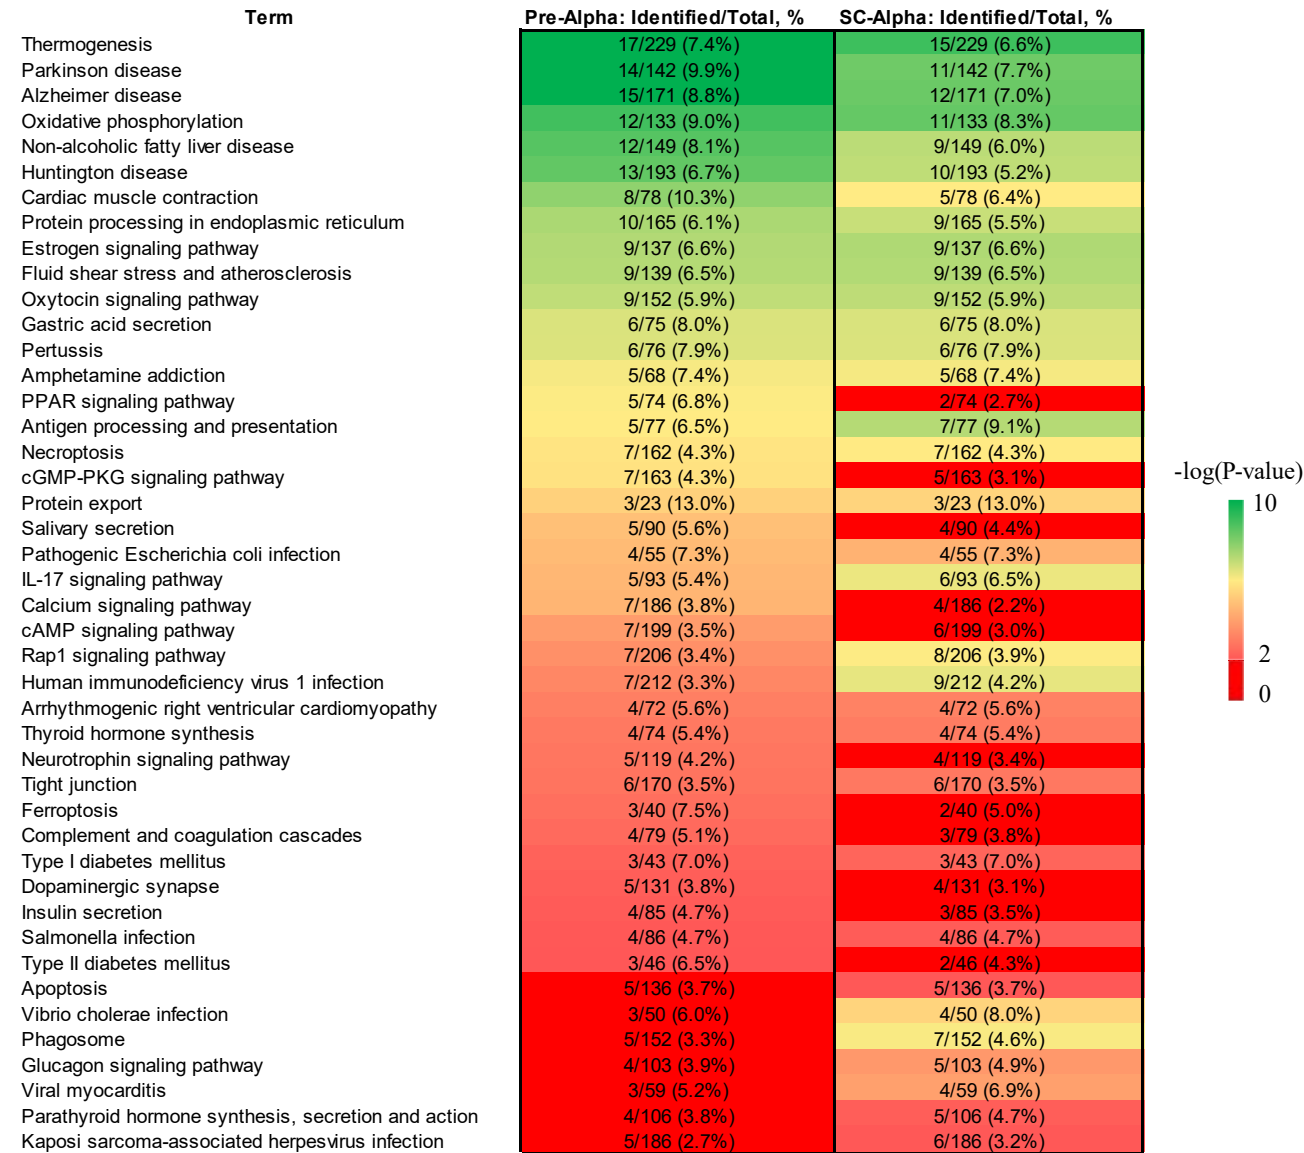

GO

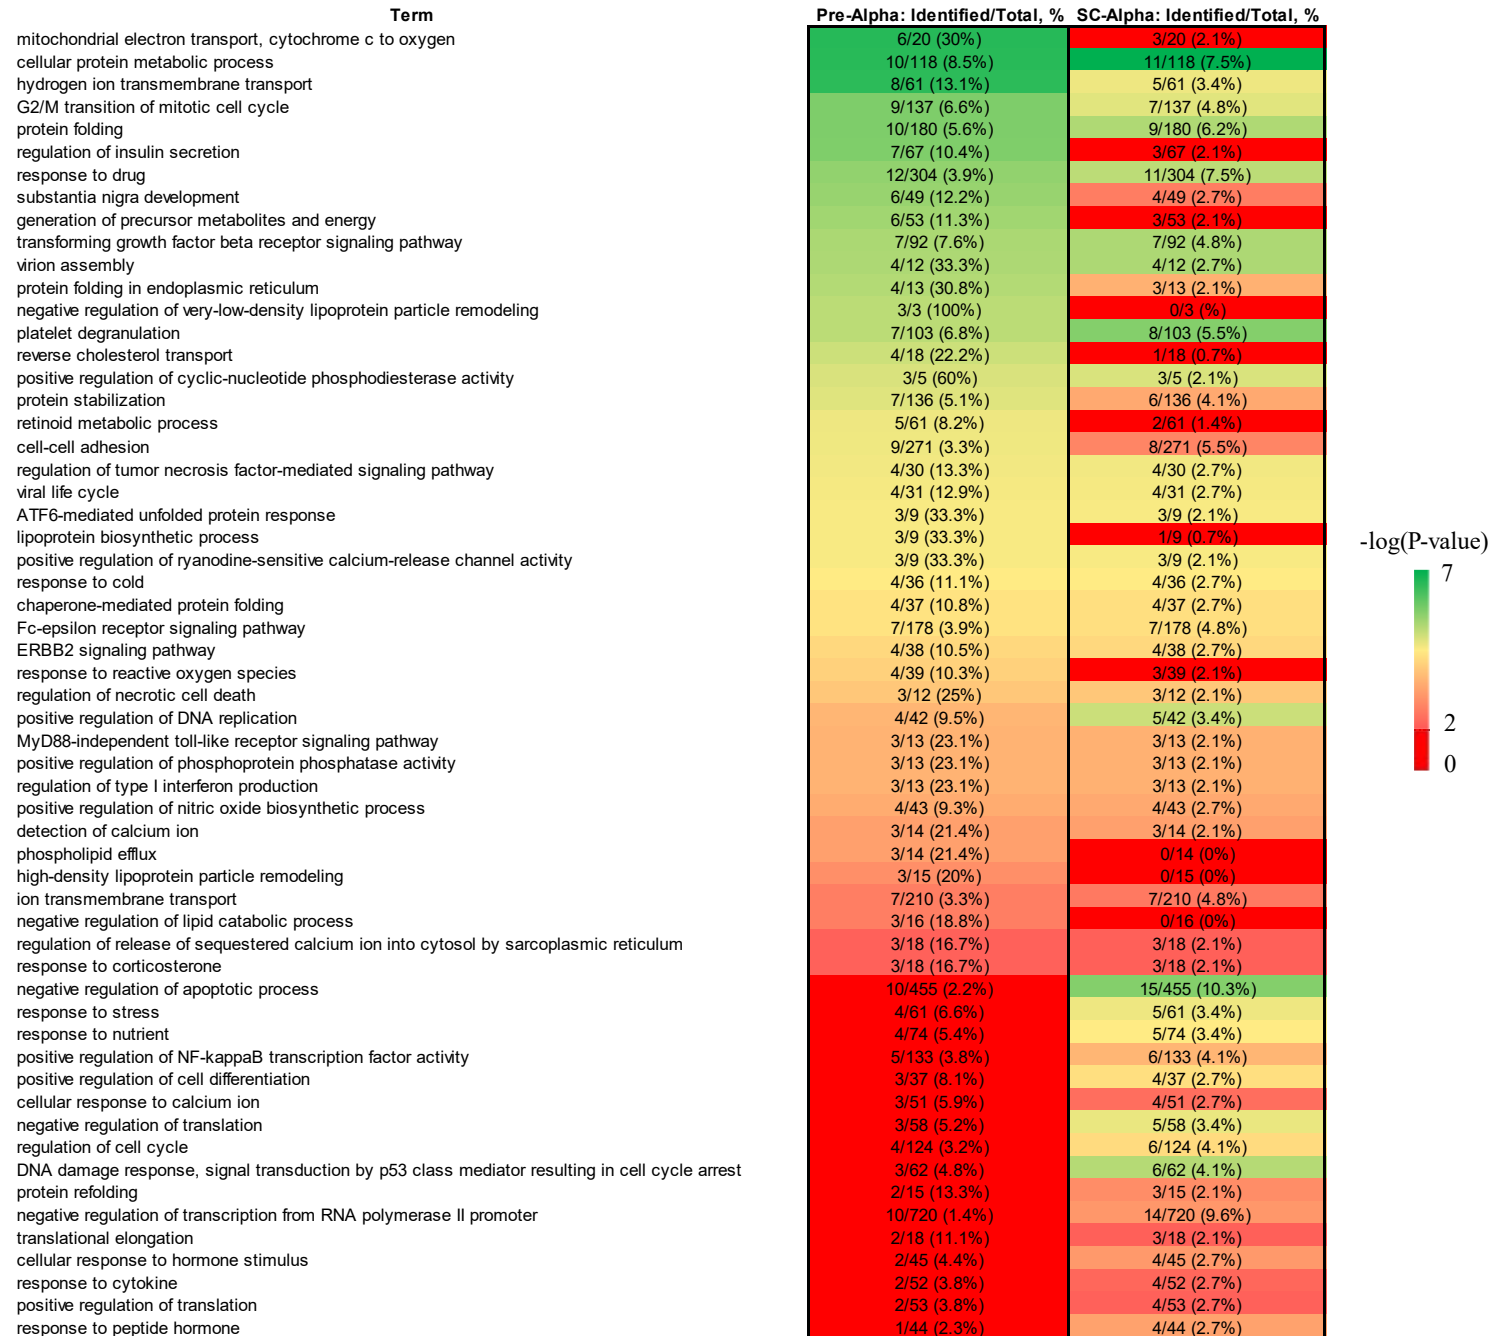

## Supplemental Figure 15.

Heatmap showing all pathways from GO-BP terms for pre-alpha and SC-alpha cells. Columns show number of genes mapped to the pathway divided by number of possible genes in the pathway, in addition to its percentage. Scale is from  $-\log(p\text{-value})$  of 2 (light red) to 7 (green). All pathways that were not significant, i.e.  $-\log(p\text{-value})$  from 0 to 2, are labeled in red. P-values calculated using an EASE Score (modified Fisher Exact test).

**Supplemental Figure 16.**

Trajectory of pre-alpha cells into SC-alpha cells as determined by Monocle v.2. Top graph shows the pseudotime trajectory, labeled by cell type, with ordering determined by genes that co-vary with insulin. Bottom graph shows progression of cells over pseudotime from pre-alpha into SC-alpha cells. Each dot represents a single cell. Right: Heatmap of the top 50 genes which co-vary with the expression of insulin and are pseudotime-dependent. Columns correspond to individual cells and rows correspond to individual genes. Genes are clustered by expression profile. Color scale based on z-score distribution from -3 (blue) to 3 (red).

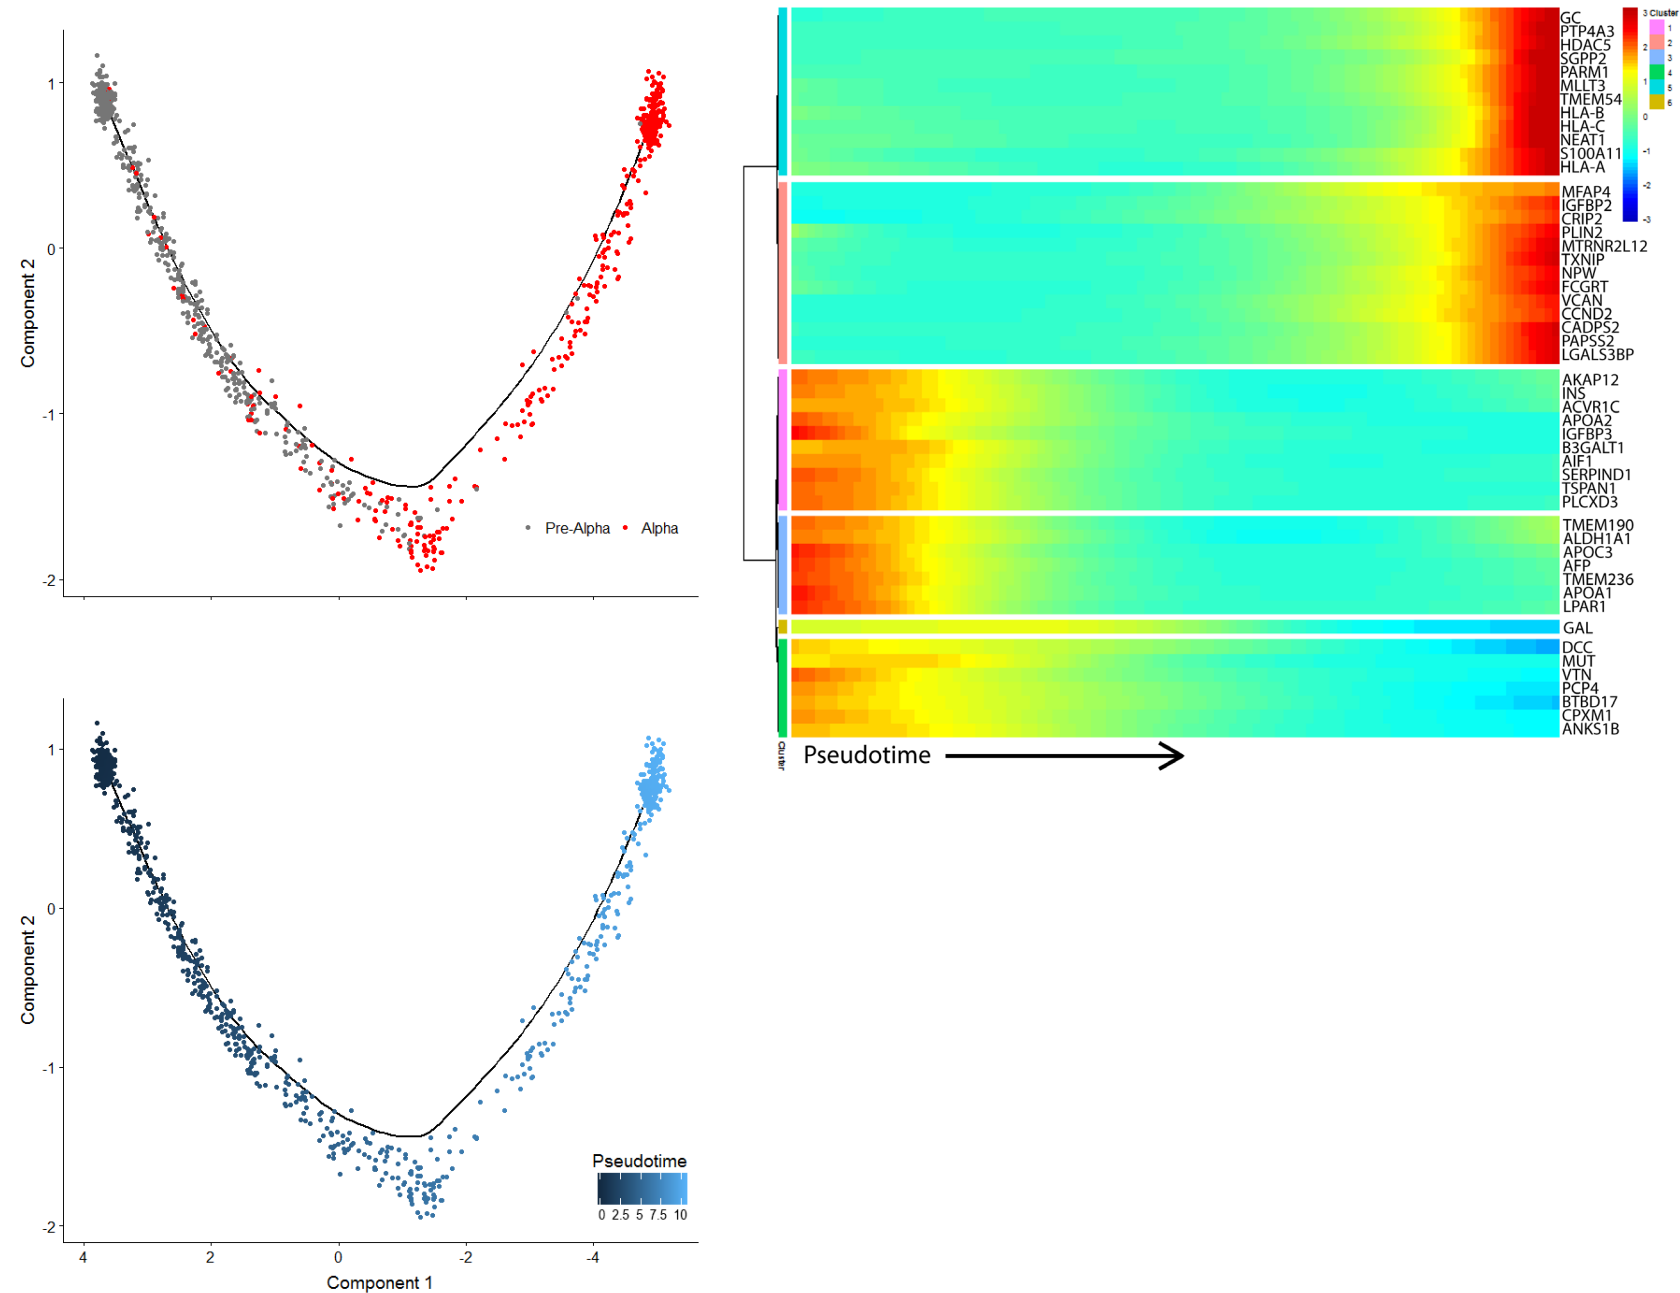

## Supplemental Figure 17

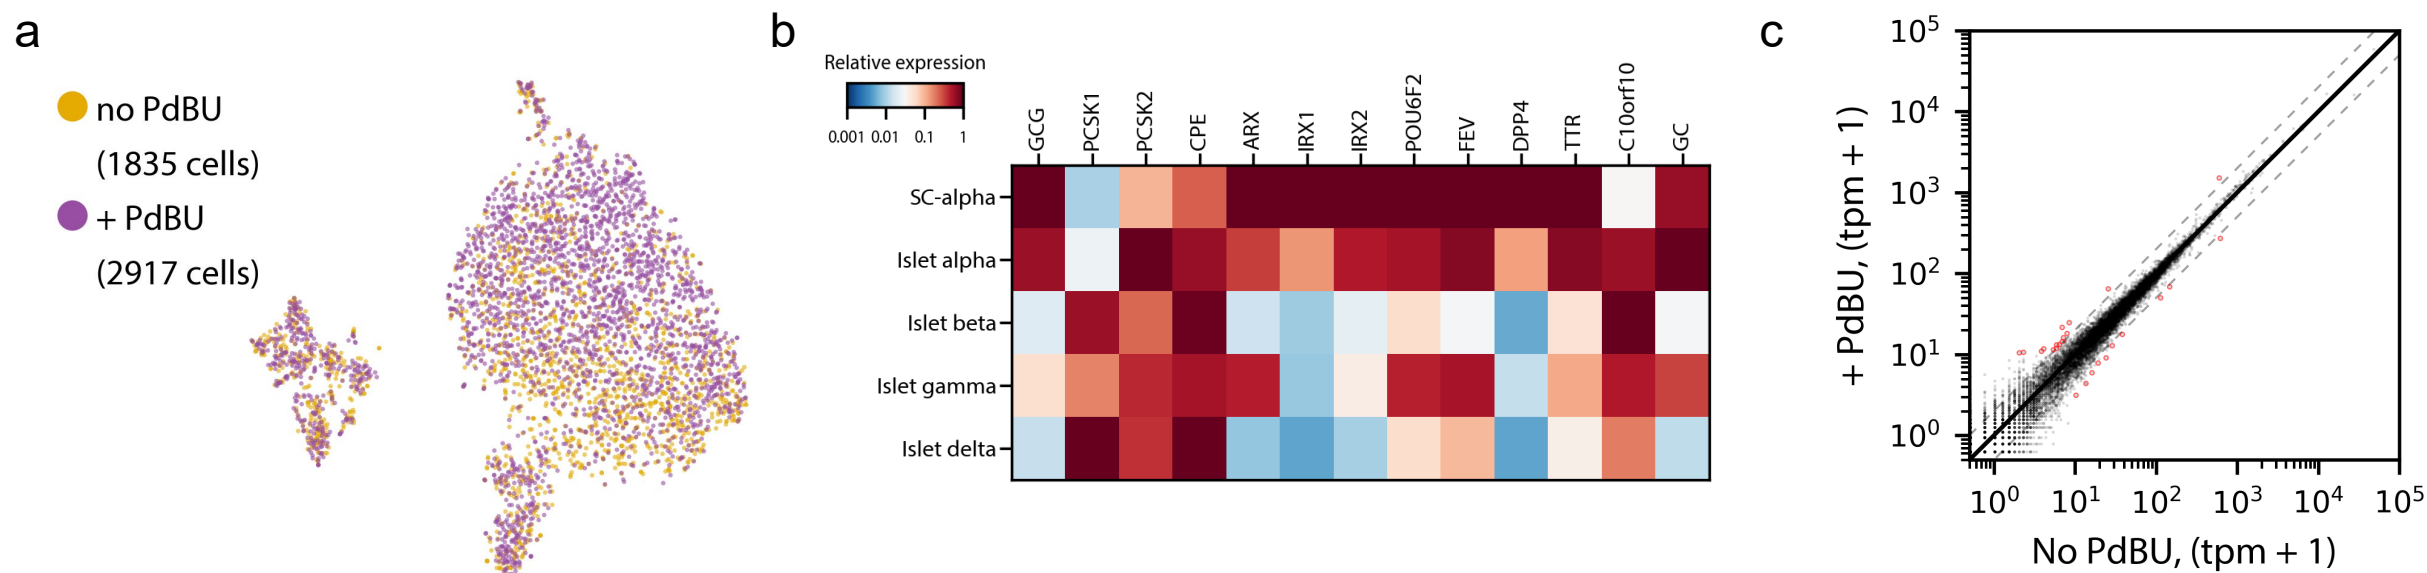

**Supplemental Figure 17.** Single cell RNAseq analysis of cells treated with and without PDBu. a) tSNE plot of cells differentiated with PDBu and without PDBu demonstrated no significant difference in gene signature despite specific differences in processing and expression of insulin and glucagon. b) Heatmap of key alpha cell marker transcript expression levels in SC-alpha cells compared to endocrine cell types from human islets. (Islet data obtained from Baron et al<sup>23</sup>) c) Differential expression analysis of pre-alpha cells and SC-alpha cells derived in the presence and absence of PDBu. Differentially expressed genes are marked in red and are listed in Supplemental Table 2.

## Supplemental Figure 18

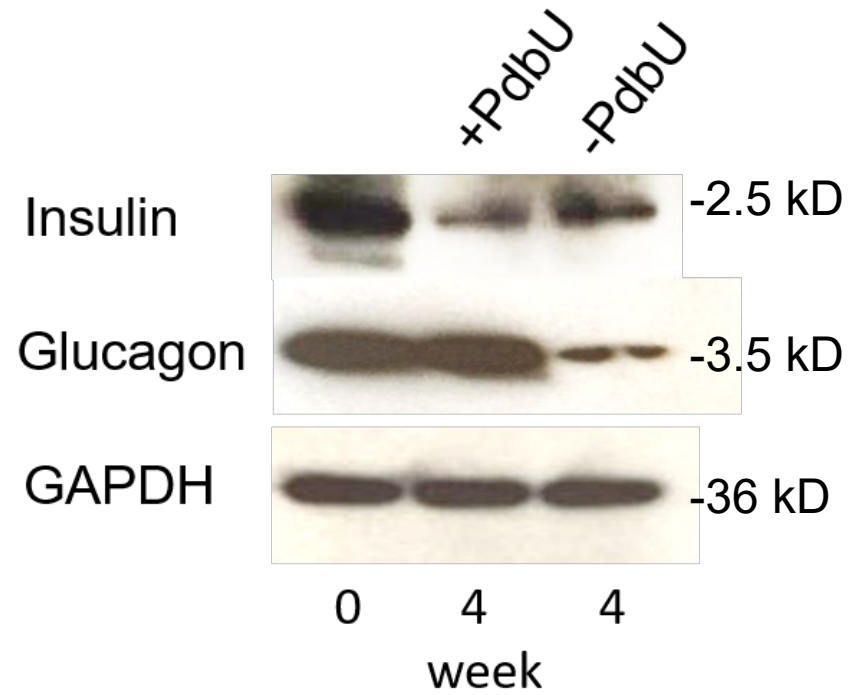

**Supplementary Figure 18.** Western blot analysis to show insulin and glucagon protein change in stage 6 cells treated with and without PDBu

Supplemental Figure 19

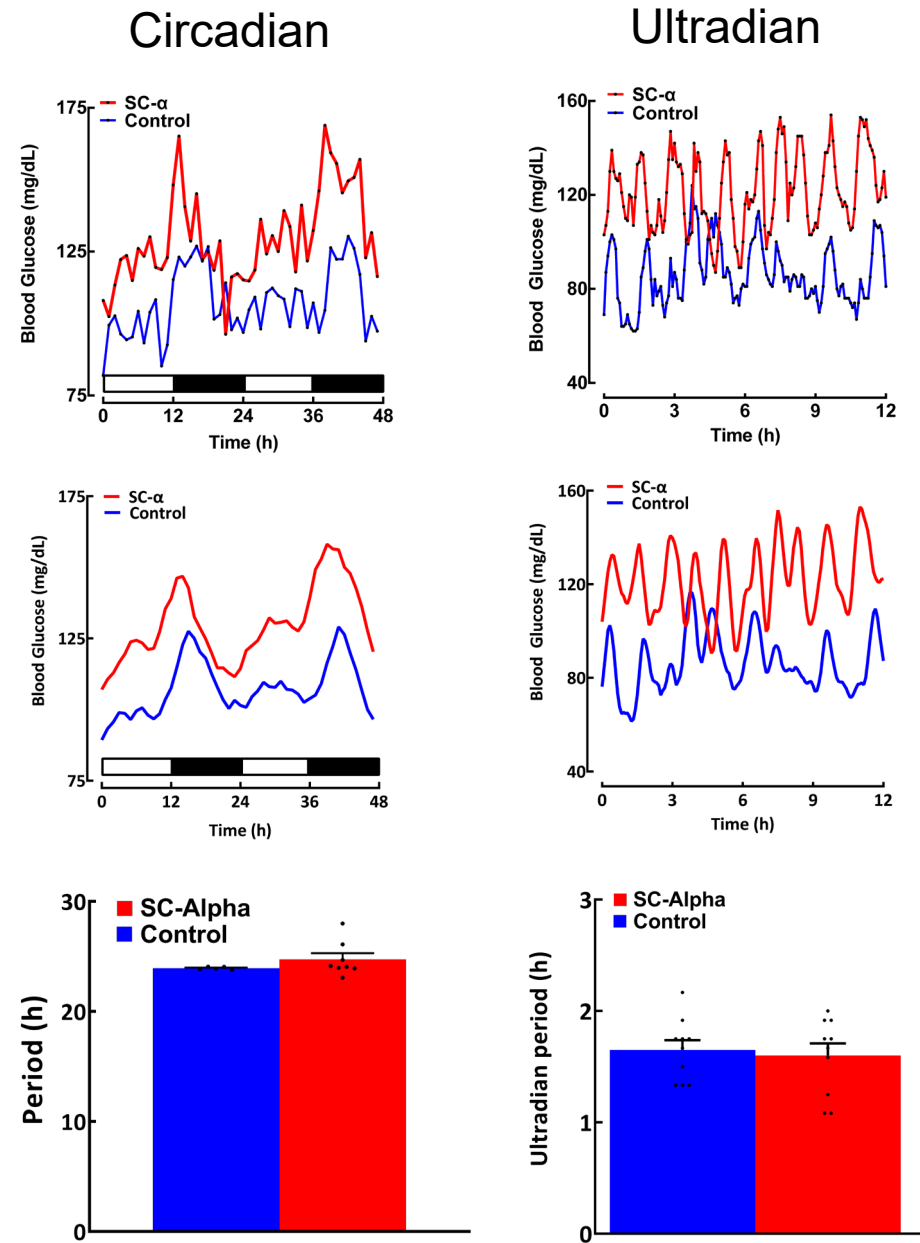

## Supplemental Figure 19.

Analysis of continuous glucose monitoring data from mice transplanted with SC-alpha cells or control animals during normal feeding and activity. Blood glucose concentration is maintained upon transplantation of SC-alpha cells as shown by raw (top) and smoothed (middle) averages of blood glucose for each cohort. Circadian rhythmicity of glucose was assessed in animals with a significantly dominant circadian period (n=5 control, n=8 SC-Alpha). Ultradian rhythmicity of glucose was assessed in animals with a significantly dominant ultradian period (n=10 control and SC-Alpha). Data is presented as mean  $\pm$  SEM. The circadian and ultradian periodicity (bottom) is not significantly modified upon transplantation of SC-alpha cells.

Supplemental Figure 20

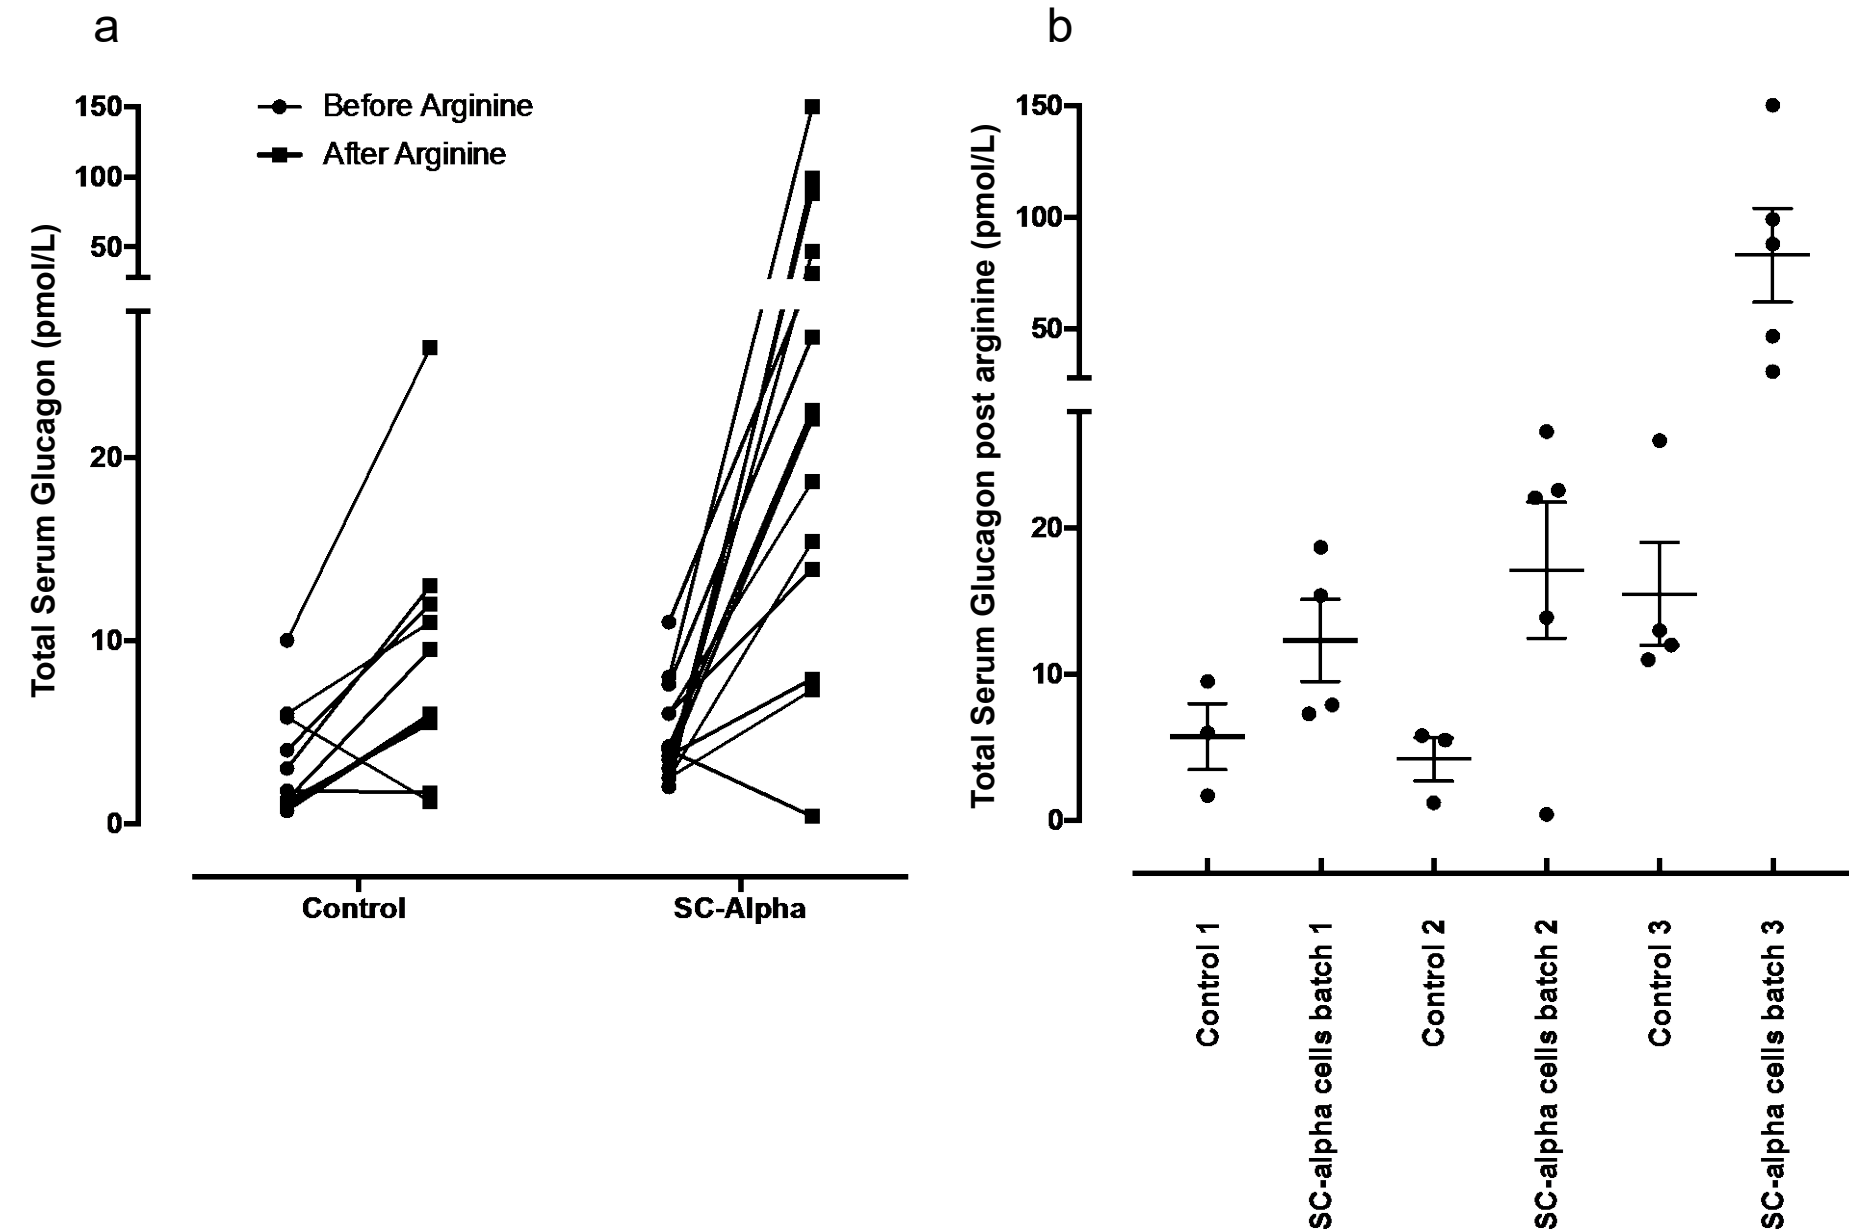

**Supplemental Figure 20.** Serum glucagon levels in response to an arginine bolus for 3 batches of SC-alpha cells generated in the 1016 iPS cell line at 4 weeks post-transplant. SC-alpha transplanted mice (n=5 animals) and control animals (n=5 animals) were fed ad libitum and injected i.v. with arginine. Serum glucagon levels were measured at time 0 and 1 minute post injection. a) Control and SC-alpha transplanted animals before and after arginine injection demonstrate significant increases in serum glucagon concentrations after arginine injection. b) comparison of serum glucagon for each batch of SC-alpha cells post arginine. Transplanted animals show an elevated level of serum glucagon. Bars represent the mean +/- SEM.

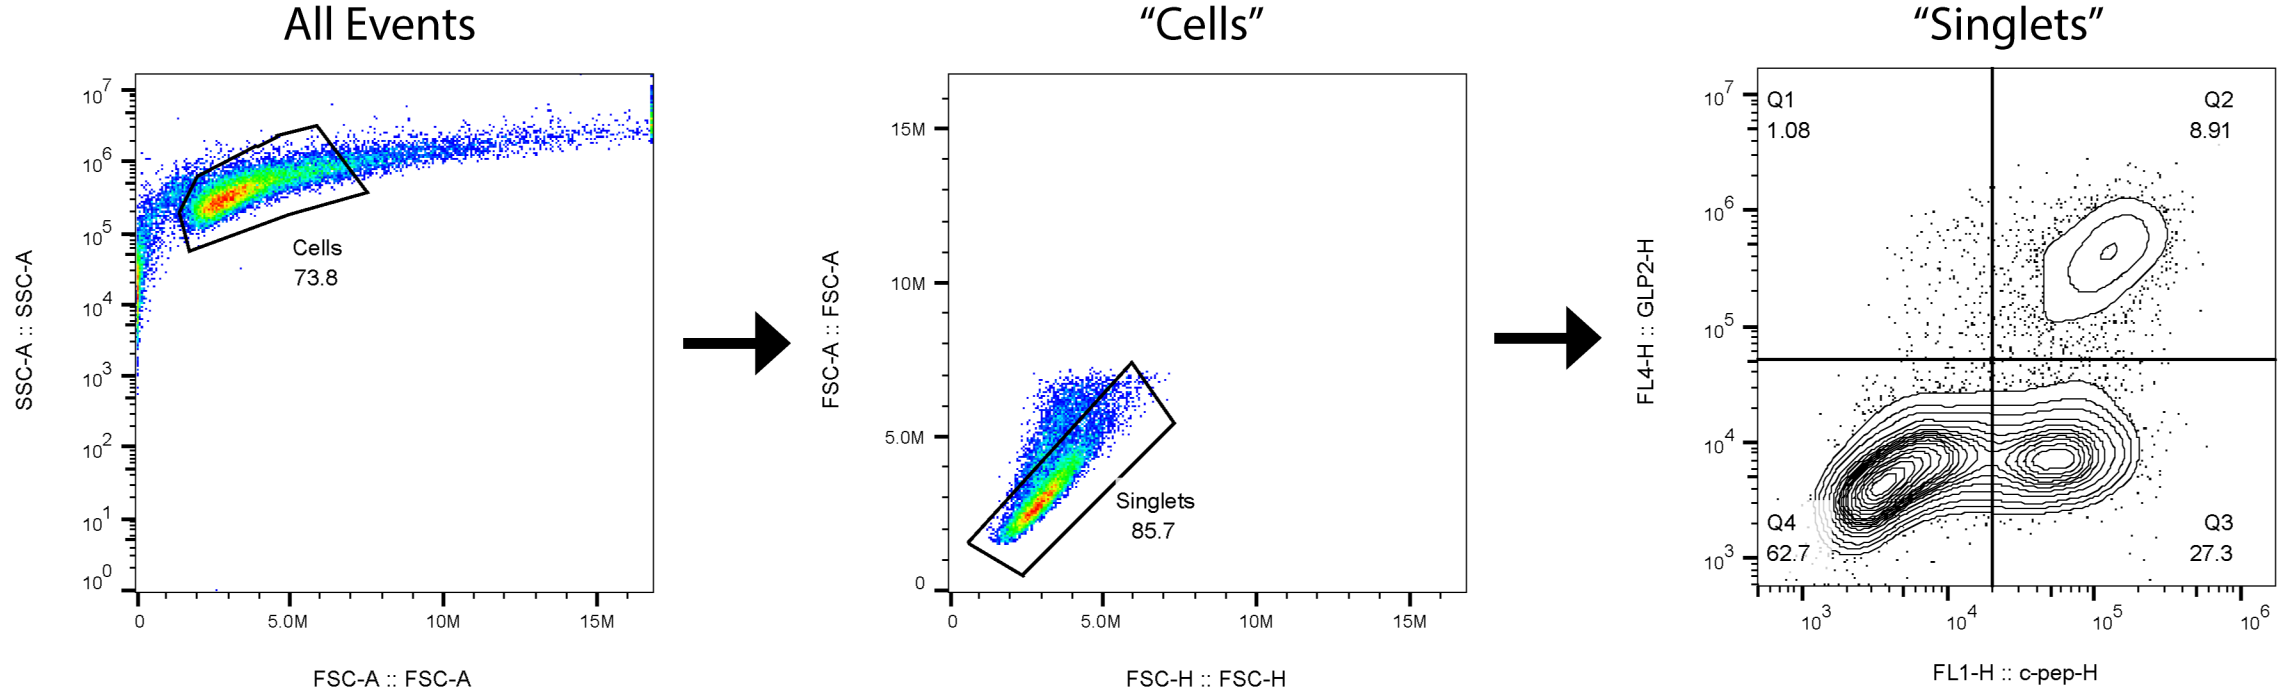

**Supplemental Figure 21.** Flow cytometry gating strategy for all flow cytometry shown in both main figures and supplementary information. All captured events are first gated by forward scatter area, side scatter area. Doublet discrimination is performed to define all singlets by gating along the diagonal of forward scatter height, forward scatter width. Final flow cytometry plots are shown as contour plots, with outliers shown.

Supplemental Figure 2c

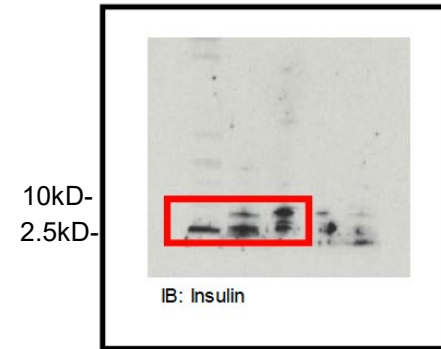

Supplemental Figure 18

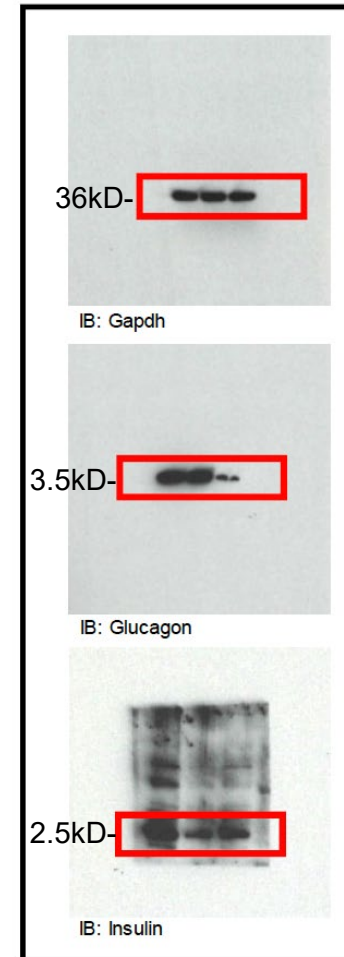

**Supplemental Figure 22.** Full Western blot images for supplemental figures S2C and S18. Raw scans with cropping lines marked in red.

Supplemental Table 1

| Chemical Name                    | Final concentration | Target/Action                                                            | Vendor & Catalog Number |
|----------------------------------|---------------------|--------------------------------------------------------------------------|-------------------------|
| Rho Kinase Inh, Y-27632 (Rhoki)  | 10 μM               | Rho Kinase Inhibitor                                                     | DNSK, DNSK-KI15-02      |
| Activin A                        | 100 ng/mL           | Smad activation and regulation of activin-responsive gene transcription. | R&D Systems, 338-AC     |
| Chir-99021 (Chir)                | 3 μM                | GSK-3α/β inhibitor                                                       | TOCRIS, 4423            |
| Keratinocyte Growth Factor (KGF) | 50 ng/mL            | FGFR2b agonist                                                           | PEPROTECH, 100-19       |
| Retinoic Acid (RA)               | 2 μM                | RAR a,b,g agonist                                                        | Sigma Aldrich, R2625    |
| LDN193189 Hydrochloride (LDN)    | 200 nM              | BMP type 1 receptor inhibitor                                            | Sigma Aldrich, SML0559  |
| Alk5 Inhibitor II (Alk5i)        | 10 μM               | Alk5 inhibitor - inhibits TGF-β/Activin signaling                        | DNSK, DNSK-ALK5-02      |
| Phorbol-12,13-dibutyrate (PDBu)  | 500 nM              | PKC Activator                                                            | Millipore-Sigma, 524390 |

**Supplemental Table 1.** Factor concentrations used during the differentiation protocol (Stage1-6).

Supplemental Table 2

|         | + PDBu      | No PDBu    |
|---------|-------------|------------|
| LGI2    | 10.467644   | 2.060103   |
| CH25H   | 10.623878   | 2.317616   |
| KCNJ8   | 21.560223   | 6.952848   |
| MOB3B   | 24.684893   | 8.497925   |
| RABEPK  | 11.717512   | 4.120206   |
| TCF24   | 10.936345   | 3.862693   |
| IGFBP2  | 1512.027792 | 602.322612 |
| ELMO1   | 64.524435   | 25.751287  |
| DACT2   | 18.123086   | 7.982899   |
| MAPT    | 16.092050   | 7.210360   |
| CDR2    | 13.123614   | 5.922796   |
| PLTP    | 11.405045   | 5.407770   |
| NR4A1   | 14.373482   | 6.952848   |
| LY75    | 13.279847   | 6.437822   |
| FAM43A  | 11.873746   | 5.922796   |
| GUCY1A2 | 17.654385   | 38.369418  |
| GRM1    | 12.811147   | 28.841422  |
| DPF1    | 7.811675    | 19.313466  |
| FXD3    | 68.430272   | 147.297364 |
| PLXD2   | 5.936873    | 16.223311  |
| ALOX5AP | 3.124670    | 10.300515  |
| AFP     | 49.994719   | 113.820690 |
| INS     | 271.221352  | 620.863539 |
| FOSB    | 9.061543    | 24.206210  |
| RASSF6  | 4.374538    | 13.648182  |

**Supplemental Table 2.**  
Differentially expressed transcripts  
between SC-alpha cells derived  
with and without PDBu treatment.

Supplemental Table 3

| Chemical Name                   | Final Concentration | Action/Target                                              | Vendor                   | Catalog Number   |  | Chemical Name         | Final Concentration | Action/Target                                                  | Vendor                   | Catalog Number |
|---------------------------------|---------------------|------------------------------------------------------------|--------------------------|------------------|--|-----------------------|---------------------|----------------------------------------------------------------|--------------------------|----------------|
| CHIR99021                       | 3 uM                | Glycogen synthase kinase 3 beta (GSK-3β) inhibitor         | Stemgent                 | 04-004           |  | Sunitinib, Free Base  | 500 nM              | An inhibitor of receptor tyrosine kinases                      | LC Laboratories          | S-8877         |
| Dorsomorphin                    | 500 nM              | AMPK Inhibitor                                             | Calbiochem               | 171261           |  | Stauprimide           | 500 nM              | Inhibits NME2 nuclear translocation                            | Sigma -Aldrich           | S2951          |
| PD0325901                       | 500 nM              | Mitogen-activated protein kinase inhibitor                 | Stemgent                 | 04-0006          |  | AG556                 | 500 nM              | EGFR-kinase inhibitor                                          | Tocris                   | 0616           |
| IWP3                            | 500 nM              | Inhibitor of Wnt Production                                | Cayman Chemical          | 13953            |  | XXI (Compound E)      | 1 uM                | Gamma secretase inhibitor                                      | Enzo Life Sciences       | 270-415-C250   |
| AA (Activin A)                  | 100 ng/mL           | Member of the TGF-beta superfamily                         | R&D Systems              | 338-AC           |  | BMS 777607            | 500 nM              | c-Met inhibitor                                                | Selleck                  | S1561          |
| LDN-193189                      | 200 nM              | ALK2 and ALK3 inhibitor                                    | Stemgent                 | 04-0074          |  | SB431542              | 500 nM              | Selective inhibitor of TGF-βRI, ALK4 and ALK7                  | Stemgent                 | 04-0010        |
| PD173074                        | 500 nM              | Tyrosine kinase inhibitor                                  | Stemcell Technologies    | PD173074         |  | PD169316              | 500 nM              | Selective inhibitor of p38 MAPK                                | Cayman Chemical          | 10006727       |
| KGF (FGF7)                      | 50 ng/mL            | KGF (FGF-7) signals through FGFR 2b                        | PeproTech                | 100-19           |  | ALK5 Inhibitor II     | 10 uM               | TGF-β inhibitor                                                | Stemgent                 | 04-0016        |
| Gefitinib                       | 500 nM              | EGFR-tyrosine kinase inhibitor                             | Santa Cruz Biotechnology | SC-202166        |  | ARQ-197               | 500 nM              | c-Met inhibitor                                                | Active Biochem           | A-1109         |
| SF1670                          | 500 nM              | PTEN inhibitor                                             | Cellagen Technologies    | C7316            |  | U0126                 | 500 nM              | Selective inhibitor of MEK1 and MEK2                           | Cayman Chemical          | 70970          |
| AICAR                           | 500 nM              | AMPK activator                                             | Tocris                   | 2840             |  | T3 (Triiodothyronine) | 1 uM                | Thyroid hormone                                                | EMD                      | 64245          |
| Sant-1                          | 250 nM              | Inhibitor of hedgehog signaling                            | R&D Systems              | 1974             |  | CP 690550             | 500 nM              | JAK3 inhibitor                                                 | Santa Cruz Biotechnology | SC-207457      |
| LY411575                        | 500 nM              | Gamma secretase inhibitor                                  | Stemgent                 | 04-0054          |  | MS275                 | 500 nM              | HDAC (Class I) inhibitor                                       | Cayman Chemical          | 13284          |
| Shz-1                           | 500 nM              | Activator of early cardiac genes in pluripotent stem cells | Stemcell Technologies    | 73422            |  | TWS119                | 500 nM              | GSK-3β inhibitor                                               | Stemcell Technologies    | 73514          |
| RG108                           | 500 nM              | Non-nucleoside DNA methyltransferase inhibitor             | Calbiochem               | 260920           |  | Betacellulin          | 20 ng/mL            | Member of the EGF family of cytokines                          | R&D Systems              | 261-CE         |
| Purmorphamine                   | 500 nM              | Smoothened (Smo) receptor agonist                          | Enzo Life Sciences       | ALX-420-045-M005 |  | INCB018424            | 500 nM              | JAK1/2 inhibitor                                               | Selleck                  | S1378          |
| IBMX                            | 500 nM              | PDE inhibitor (non-selective)                              | Stemcell Technologies    | 72762            |  | SU5402                | 500 nM              | Potent FGFR and VEGFR inhibitor                                | Tocris                   | 3300           |
| PDBu (Phorbol 12,13-dibutyrate) | 500 nM              | Protein kinase C activator                                 | EMD                      | 524390           |  | DEAB                  | 500 nM              | Inhibitor of cytosolic (class 1) aldehyde dehydrogenase (ALDH) | Sigma -Aldrich           | D86256         |
| BIX01294                        | 500 nM              | GLP and G9a inhibitor                                      | Tocris                   | 3364             |  | SC1 (Pluripotin)      | 500 nM              | Dual ERK1/RasGAP inhibitor                                     | Santa Cruz Biotechnology | SC-255607      |
| Reversine                       | 500 nM              | Aurora A, B, and C kinase inhibitor                        | Cayman Chemical          | 10004412         |  | A769662               | 500 nM              | Potent AMPK activator                                          | Stemcell Technologies    | 72922          |
| LE135                           | 500 nM              | Selective RARβ antagonist                                  | Tocris                   | 2021             |  | GABA                  | 500 nM              | Activator of GABA Receptor.                                    | Santa Cruz Biotechnology | sc-203053      |
| All Trans Retinoic Acid         | 2 uM                | Binds to retinoic acid receptor                            | Enzo Life Sciences       | BML-GR100-0500   |  | DMSO                  | 0.1%                | Control                                                        | Fisher                   | BP231          |

Supplemental Table 3. Chemicals and concentrations used for the small molecule screen.
